# Supplementary material for: Development of Novel Therapeutics for Schizophrenia Treatment Based on a Selective Positive Allosteric Modulation of α1-Containing GABAARs—In Silico Approach
Source: MDPI journal article supplement (doi:10.3390/cimb44080234), 2022-07-29
Supplement: s1 [file s1]

## Supplementary Materials

### Development of Novel Therapeutics for Schizophrenia Treatment Based on a Selective Positive Allosteric Modulation of $\alpha 1$ -Containing GABAARs—In Silico Approach

Table of content

|                                          |    |
|------------------------------------------|----|
| The Monte Carlo optimization method..... | 1  |
| Table S1.....                            | 4  |
| Table S2.....                            | 6  |
| Table S3.....                            | 7  |
| Figure S1 .....                          | 8  |
| Table S4.....                            | 9  |
| Figures S2-S11.....                      | 11 |
| Table S5.....                            | 21 |
| Figures S12-S21.....                     | 25 |

## The Monte Carlo optimization method

Each optimal descriptor which is obtained by utilizing the Monte Carlo method is assigned a numerical value, i.e. the correlation weight (CW). This process is resolved by the Monte Carlo method through the creation of appropriate random numbers and observation of the manner in which this number fraction obeys a property or certain properties, where the CW value is randomly assigned to descriptors based on the SMILES in each independent Monte Carlo run and for a defined endpoint. Numerical data calculations concerning the correlation weights that yield the maximum correlation coefficient value between an endpoint and the optimal descriptor are achieved by employing the optimization process of the Monte Carlo method. Two parameters – Threshold (T) and the Number of epochs ( $N_{\text{epoch}}$ ) should be taken into account when this method is utilized for the purpose of building a QSAR model. Threshold represents a coefficient for the classification of numerous molecular features (including both SMILES based molecular fragments and SMILES based indices), calculated from the SMILES notation and classified into two categories: a) active (in this case, the modeling process involves the correlation weight); and b) rare (the modeling process does not include the correlation weight in this case). The process is realized as follows: the molecule descriptor X should be removed from model building in case a single molecular feature (X) defined from the SMILES notation of molecules within the training set occurs less than T times. Thus, the numerical value representing this feature (the correlation weight of the X,

CW(X)) is set as zero, and is, therefore, defined as rare. All the other molecular features can be used for model building and are active. The training set's best statistical quality is provided by  $N_{\text{epoch}}$ , which signifies the Monte Carlo optimization epoch number. Once an unlimited epoch number is applied, the above-mentioned Monte Carlo optimization provides the maximum correlation coefficient for the training set. Nevertheless, the maximum correlation coefficient between the optimal descriptor and the endpoint for the external test set exists for a certain number of epochs. Calculations favor this epoch number, as there is good predictive potential of the obtained model, in the event that the number of epochs reaches the said value. Conversely, the T increase is followed by the training set's correlation coefficient decrease. Nonetheless, the threshold providing the test set's maximum correlation coefficient does exist. The mentioned threshold is preferable when observed from the practical perspective. Preferable values of the threshold, as well as the Monte Carlo optimization epoch number (T and  $N_{\text{epoch}}$ ), need to be defined for the purpose of preparing a proper QSAR model with the application of the both SMILES notation and molecular-graph based optimal descriptor. Monte Carlo method simulations are run on the basis of iterative algorithms, with the aim of revealing the distribution of an unknown probabilistic entity. The Monte Carlo optimization process does include a number of epochs of the training set for a specified target function. The first operation is the termination of CW (SA) for each SMILES attribute SA, with the starting values of all CWs set to  $1 \pm 0.01 \times \text{Rnd}$  (Rnd stands for the random value generator,

with a range of 0 to 1). A random sequence replaces the regular attribute number order. The following step involves the assessment of the target function's starting value, as well as further correlation weight modification. Afterwards, relevant steps are repeated in the Monte Carlo optimization for all the non-rare attributes. The QSAR model is calculated (by using the training set) through the utilization of the linear regression approach (Eq. 1), once the numerical data regarding the correlation weights from the model is obtained, with preferable statistics for the test set. In the presented research the search for the best combination of T and N<sub>epoch</sub> was performed within values 1-5 for T and 0-50 for N<sub>epoch</sub>.

$$A_c = C_0 + C_1 \times DCW(T, N_{epoch}) \quad (1)$$

which are already in use in QSAR model development. The computations were conducted with the CORAL software, and the use of Eq. 2

$$d(A) = \frac{|P(A_{train}) - P(A_{test})|}{N(A_{train}) - N(A_{test})} \quad (2)$$

In the Eq, P(A<sub>train</sub>) and P(A<sub>calib</sub>) define the probabilities of a conformation-independent attribute or descriptor (A) in the training and test sets, respectively, while N(A<sub>train</sub>) and N(A<sub>calib</sub>) define the frequency of a conformation-independent attribute or descriptor (A) which appears in the training and test sets, respectively. The statistical SMILES defect (D) is the sum of defects, d(A), of all the attributes available in the molecules SMILES notation, and it is mathematically defined as in Eq. 3

$$D = defect(SMILES) = \sum_{k=1}^{NA} d(A) \quad (3)$$

The molecule is not classified in defined AD, and is a categorized outlier, if its  $D > 2 \times D_{av}$ ; where  $D_{av}$  is the average of the  $D$  calculated for the appropriate set (training or test) where the molecule is placed.

Table S1. The SMILES notation of the studied molecules, calculated values for the DCW, experimental data (Ac) – expr, the values of Ac calculated with the application of CORAL software – calc, the difference between expr and calc – diff for the built QSPR model.

| SMILES notation |                                                                     | Expr  | Split 1      |            |             |     | Split 2      |            |             |     | Split 3      |            |             |     |
|-----------------|---------------------------------------------------------------------|-------|--------------|------------|-------------|-----|--------------|------------|-------------|-----|--------------|------------|-------------|-----|
|                 |                                                                     |       | DCW          | Calc.      | Diff        | Set | DCW          | Calc.      | Diff        | Set | DCW          | Calc.      | Diff        | Set |
| 1               | <chem>Fc1ccc(cc1)c1nc2n(c1CC(=O)N(C)C)cc(cc2)C</chem>               | 7.222 | 134.409<br>8 | 7.168<br>1 | 0.0539      | Tr  | 151.751      | 7.042      | 0.18        | Tr  | 108.942<br>4 | 7.089<br>2 | 0.1328      | Ts  |
| 2               | <chem>Cc1ccc(cc1)c1nc2n(c1CC(=O)N(C)C)cc(cc2)F</chem>               | 7.602 | 137.636<br>7 | 7.365<br>6 | 0.2364      | Ts  | 161.577      | 7.448<br>6 | 0.1534      | Tr  | 113.444<br>4 | 7.516      | 0.086       | Tr  |
| 3               | <chem>Fc1ccc2n(c1)c(CC(=O)N(C)C)c(n2)c1ccccc1</chem>                | 6.886 | 125.198<br>4 | 6.604<br>3 | 0.2817      | Tr  | 155.674<br>9 | 7.204<br>3 | -<br>0.3183 | Tr  | 105.427<br>8 | 6.755<br>9 | 0.1301      | Tr  |
| 4               | <chem>Fc1cccc(c1)c1nc2n(c1CC(=O)N(C)C)cc(cc2)F</chem>               | 6.854 | 128.799<br>3 | 6.824<br>7 | 0.0293      | Tr  | 145.115<br>3 | 6.767<br>4 | 0.0866      | Tr  | 106.843<br>2 | 6.890<br>1 | -<br>0.0361 | Ts  |
| 5               | <chem>Fc1ccc(c(c1)F)c1nc2n(c1CC(=O)N(C)C)cc(cc2)F</chem>            | 6.745 | 130.467<br>8 | 6.926<br>9 | -<br>0.1819 | Tr  | 144.105<br>7 | 6.725<br>6 | 0.0194      | Tr  | 106.976<br>1 | 6.902<br>7 | -<br>0.1577 | Tr  |
| 6               | <chem>Fc1ccc2n(c1)c(CC(=O)N(C)C)c(n2)c1ccc(cc1)C(F)(F)F</chem>      | 7.167 | 135.961      | 7.263<br>1 | -<br>0.0961 | Tr  | 157.294<br>2 | 7.271<br>3 | -<br>0.1043 | Ts  | 109.981<br>2 | 7.187<br>7 | -<br>0.0207 | Tr  |
| 7               | <chem>Fc1ccc(cc1)c1nc2n(c1CC(=O)N(C)C)cc(cc2)C(F)(F)F</chem>        | 6.292 | 123.871      | 6.523<br>1 | -<br>0.2311 | Tr  | 138.983<br>6 | 6.513<br>7 | -<br>0.2217 | Tr  | 101.478<br>1 | 6.381<br>4 | -<br>0.0894 | Tr  |
| 8               | <chem>Fc1ccc(c(c1)F)c1nc2n(c1CC(=O)N(C)C)cc(cc2)C(F)(F)F</chem>     | 6.081 | 118.107<br>2 | 6.170<br>3 | -<br>0.0893 | Ts  | 128.919<br>2 | 6.097<br>2 | -<br>0.0162 | Tr  | 99.4848<br>6 | 6.192<br>4 | -<br>0.1114 | Tr  |
| 9               | <chem>O=C(N(C)C)Cc1c(nc2n1cc(cc2)C(F)(F)F)c1ccc(cc1)C(F)(F)F</chem> | 6.312 | 119.969<br>3 | 6.284<br>3 | 0.0277      | Tr  | 134.302<br>2 | 6.319<br>9 | -<br>0.0079 | Tr  | 100.400<br>2 | 6.279<br>2 | 0.0328      | Ts  |
| 10              | <chem>Fc1ccc(cc1)c1nc2n(c1CC(=O)N(C)C)cc(cc2)F</chem>               | 7.252 | 136.231<br>7 | 7.279<br>6 | -<br>0.0276 | Tr  | 154.170<br>1 | 7.142<br>1 | 0.1099      | Tr  | 108.969<br>4 | 7.091<br>7 | 0.1603      | Tr  |
| 11              | <chem>Fc1ccc2n(c1)c(CC(=O)N(C)C)c(n2)c1ccc(c(c1)F)F</chem>          | 7.237 | 134.059<br>1 | 7.146<br>7 | 0.0903      | Tr  | 157.603      | 7.284<br>1 | -<br>0.0471 | Tr  | 111.967<br>8 | 7.376      | -0.139      | Tr  |
| 12              | <chem>Fc1cccc(c1)c1nc2n(c1CC(=O)N(C)C)cc(cc2)C(F)(F)F</chem>        | 6.137 | 116.438<br>6 | 6.068<br>2 | 0.0688      | Tr  | 129.928<br>8 | 6.139      | -0.002      | Ts  | 99.3518<br>9 | 6.179<br>8 | -<br>0.0428 | Tr  |
| 13              | <chem>CC(=O)NCc1c(nc2n1cc(C)cc2)c1ccc(cc1)F</chem>                  | 7.106 | 135.506<br>3 | 7.235<br>2 | -<br>0.1292 | Tr  | 156.218<br>8 | 7.226<br>8 | -<br>0.1208 | Tr  | 110.098<br>6 | 7.198<br>8 | -<br>0.0928 | Tr  |
| 14              | <chem>CCC(=O)NCc1c(nc2n1cc(C)cc2)c1ccc(cc1)F</chem>                 | 7.565 | 139.165<br>4 | 7.459<br>2 | 0.1058      | Tr  | 158.835<br>7 | 7.335<br>1 | 0.2299      | Tr  | 111.900<br>6 | 7.369<br>7 | 0.1953      | Tr  |
| 15              | <chem>O=C(C(C)C)NCc1c(nc2n1cc(C)cc2)c1ccc(cc1)F</chem>              | 6.439 | 128.374<br>2 | 6.798<br>7 | -<br>0.3597 | Tr  | 141.123<br>5 | 6.602<br>2 | -<br>0.1632 | Tr  | 104.317<br>7 | 6.650<br>6 | -<br>0.2116 | Ts  |
| 16              | <chem>O=C(C1CC1)NCc1c(nc2n1cc(C)cc2)c1ccc(cc1)F</chem>              | 6.836 | 133.728<br>1 | 7.126<br>4 | -<br>0.2904 | Tr  | 154.926<br>1 | 7.173<br>3 | -<br>0.3373 | Ts  | 109.671<br>1 | 7.158<br>3 | -<br>0.3223 | Tr  |

|        |                                                               |       |              |            |             |    |              |            |             |    |              |            |             |    |
|--------|---------------------------------------------------------------|-------|--------------|------------|-------------|----|--------------|------------|-------------|----|--------------|------------|-------------|----|
| 1<br>7 | <chem>CC(=O)NCc1c(nc2n1cc(F)cc2)c1ccc(cc1)C</chem>            | 7.357 | 137.620<br>9 | 7.364<br>7 | -<br>0.0077 | Tr | 163.277<br>8 | 7.518<br>9 | -<br>0.1619 | Tr | 112.938<br>3 | 7.468<br>1 | -<br>0.1111 | Tr |
| 1<br>8 | <chem>CCC(=O)NCc1c(nc2n1cc(F)cc2)c1ccc(cc1)C</chem>           | 7.438 | 141.28       | 7.588<br>6 | -<br>0.1506 | Ts | 165.894<br>7 | 7.627<br>2 | -<br>0.1892 | Tr | 114.740<br>3 | 7.638<br>9 | -<br>0.2009 | Tr |
| 1<br>9 | <chem>O=C(C(C)C)NCc1c(nc2n1cc(F)cc2)c1ccc(cc1)C</chem>        | 7.058 | 130.488<br>8 | 6.928<br>1 | 0.1299      | Tr | 148.182<br>5 | 6.894<br>3 | 0.1637      | Tr | 107.157<br>4 | 6.919<br>9 | 0.1381      | Tr |
| 2<br>0 | <chem>O=C(C1CC1)NCc1c(nc2n1cc(F)cc2)c1ccc(cc1)C</chem>        | 7.259 | 135.842<br>7 | 7.255<br>8 | 0.0032      | Ts | 161.985<br>1 | 7.465<br>4 | -<br>0.2064 | Ts | 112.510<br>8 | 7.427<br>5 | -<br>0.1685 | Tr |
| 2<br>1 | <chem>CC(=O)NCc1c(nc2n1cc(F)cc2)c1ccc(cc1)F</chem>            | 7.367 | 136.245<br>7 | 7.280<br>5 | 0.0865      | Tr | 160.031<br>3 | 7.384<br>6 | -<br>0.0176 | Tr | 110.825<br>3 | 7.267<br>7 | 0.0993      | Tr |
| 2<br>2 | <chem>CCC(=O)NCc1c(nc2n1cc(F)cc2)c1ccc(cc1)F</chem>           | 7.432 | 139.904<br>9 | 7.504<br>5 | -<br>0.0725 | Tr | 162.648<br>3 | 7.492<br>9 | -<br>0.0609 | Tr | 112.627<br>4 | 7.438<br>6 | -<br>0.0066 | Ts |
| 2<br>3 | <chem>O=C(C(C)C)NCc1c(nc2n1cc(F)cc2)c1ccc(cc1)F</chem>        | 6.51  | 129.113<br>7 | 6.844      | -0.334      | Ts | 144.936<br>1 | 6.76       | -0.25       | Tr | 105.044<br>4 | 6.719<br>5 | -<br>0.2095 | Tr |
| 2<br>4 | <chem>O=C(C1CC1)NCc1c(nc2n1cc(F)cc2)c1ccc(cc1)F</chem>        | 7.68  | 134.467<br>6 | 7.171<br>7 | 0.5083      | Tr | 158.738<br>6 | 7.331<br>1 | 0.3489      | Tr | 110.397<br>8 | 7.227<br>2 | 0.4528      | Tr |
| 2<br>5 | <chem>CC(=O)NCc1c(nc2n1cc(F)cc2)c1ccc(c(c1)F)F</chem>         | 7.409 | 137.965<br>5 | 7.385<br>8 | 0.0232      | Tr | 162.580<br>1 | 7.490<br>1 | -<br>0.0811 | Ts | 111.387<br>7 | 7.321      | 0.088       | Ts |
| 2<br>6 | <chem>CCC(=O)NCc1c(nc2n1cc(F)cc2)c1ccc(c(c1)F)F</chem>        | 7.62  | 141.624<br>6 | 7.609<br>7 | 0.0103      | Tr | 165.197      | 7.598<br>3 | 0.0217      | Tr | 113.189<br>7 | 7.491<br>9 | 0.1281      | Tr |
| 2<br>7 | <chem>Fc1ccc2n(c1)c(CNC(=O)C(C)C)c(n2)c1ccc(c(c1)F)F</chem>   | 7.143 | 135.764<br>3 | 7.251      | -0.108      | Ts | 152.416      | 7.069<br>5 | 0.0735      | Ts | 109.228<br>2 | 7.116<br>3 | 0.0267      | Ts |
| 2<br>8 | <chem>Fc1ccc2n(c1)c(CNC(=O)C1CC1)c(n2)c1ccc(c(c1)F)F</chem>   | 7.642 | 141.583<br>2 | 7.607<br>2 | 0.0348      | Tr | 165.535<br>2 | 7.612<br>3 | 0.0297      | Tr | 114.570<br>3 | 7.622<br>8 | 0.0192      | Tr |
| 2<br>9 | <chem>CC(=O)NCc1c(nc2n1cc(F)cc2)c1ccc(cc1)C(F)(F)F</chem>     | 7.203 | 136.285<br>4 | 7.282<br>9 | -<br>0.0799 | Ts | 157.948<br>8 | 7.298<br>4 | -<br>0.0954 | Ts | 110.418<br>5 | 7.229<br>1 | -<br>0.0261 | Ts |
| 3<br>0 | <chem>CCC(=O)NCc1c(nc2n1cc(F)cc2)c1ccc(cc1)C(F)(F)F</chem>    | 7.319 | 139.944<br>5 | 7.506<br>9 | -<br>0.1879 | Tr | 160.565<br>7 | 7.406<br>7 | -<br>0.0877 | Tr | 112.220<br>6 | 7.4        | -0.081      | Tr |
| 3<br>1 | <chem>O=C(C(C)C)NCc1c(nc2n1cc(F)cc2)c1ccc(cc1)C(F)(F)F</chem> | 7.064 | 129.153<br>3 | 6.846<br>4 | 0.2176      | Ts | 142.853<br>5 | 6.673<br>8 | 0.3902      | Tr | 104.637<br>6 | 6.681      | 0.383       | Tr |
| 3<br>2 | <chem>O=C(C1CC1)NCc1c(nc2n1cc(F)cc2)c1ccc(cc1)C(F)(F)F</chem> | 7.174 | 134.507<br>2 | 7.174<br>1 | -<br>0.0001 | Tr | 156.656      | 7.244<br>9 | -<br>0.0709 | Tr | 109.991      | 7.188<br>6 | -<br>0.0146 | Tr |
| 3<br>3 | <chem>Cc1ccc(cc1)c1nc2n(c1CC(=O)N(C)C)cc(cc2)C</chem>         | 7.357 | 135.315<br>3 | 7.223<br>5 | 0.1335      | Tr | 154.487<br>1 | 7.155<br>2 | 0.2018      | Ts | 112.090<br>2 | 7.387<br>6 | -<br>0.0306 | Tr |

Table S2. Y-randomization of the best QSAR model (best optimization run) for three independent splits.

|                                                            | Split 1  |        | Split 2  |        | Split 3  |        |
|------------------------------------------------------------|----------|--------|----------|--------|----------|--------|
| Run                                                        | Training | Test   | Training | Test   | Training | Test   |
| 0                                                          | 0.8302   | 0.8586 | 0.8518   | 0.8523 | 0.8411   | 0.9479 |
| 1                                                          | 0.0164   | 0.0089 | 0.0785   | 0.0777 | 0.0012   | 0.5381 |
| 2                                                          | 0.0085   | 0.0275 | 0.0912   | 0      | 0.0002   | 0.0336 |
| 3                                                          | 0.0015   | 0.1233 | 0.0155   | 0.1729 | 0.0149   | 0.3295 |
| 4                                                          | 0.0855   | 0.0517 | 0.0137   | 0.2325 | 0.0095   | 0.0983 |
| 5                                                          | 0.0205   | 0.096  | 0.0011   | 0.3956 | 0.0173   | 0.4075 |
| 6                                                          | 0.0033   | 0.1001 | 0.0592   | 0.0834 | 0.0471   | 0.3418 |
| 7                                                          | 0.0024   | 0.0324 | 0.1329   | 0.6299 | 0.0141   | 0.0583 |
| 8                                                          | 0.0221   | 0.2024 | 0.016    | 0.0599 | 0.432    | 0.3368 |
| 9                                                          | 0.0329   | 0.3063 | 0.0613   | 0.1237 | 0.0759   | 0.0203 |
| 10                                                         | 0.0426   | 0.1857 | 0.065    | 0.2873 | 0.0195   | 0.0008 |
| $R_r^2$                                                    | 0.0236   | 0.1134 | 0.0534   | 0.2063 | 0.0632   | 0.2165 |
| $^cR_p^2$                                                  | 0.8184   | 0.7999 | 0.8246   | 0.742  | 0.8089   | 0.8327 |
| $^cR_p^2 = R \times (R^2 - R_r^2)^{1/2}$ should be $> 0.5$ |          |        |          |        |          |        |



Table S3. The statistical quality of QSAR models developed with the GA-MLR method for selective positive allosteric modulation of  $\alpha 1$ -containing GABA<sub>A</sub>Rs.

| Fitting criteria                                                                                                                                                                |                                               |                                               |                               |                                 |                              |                     |                   |        |         |
|---------------------------------------------------------------------------------------------------------------------------------------------------------------------------------|-----------------------------------------------|-----------------------------------------------|-------------------------------|---------------------------------|------------------------------|---------------------|-------------------|--------|---------|
| R <sup>2</sup>                                                                                                                                                                  | R <sup>2</sup> <sub>adj</sub>                 | R <sup>2</sup> -R <sup>2</sup> <sub>adj</sub> | LOF                           | RMSE <sub>tr</sub>              | MAE <sub>tr</sub>            | RSS <sub>tr</sub>   | CCC <sub>tr</sub> | s      | F       |
| 0.8986                                                                                                                                                                          | 0.8719                                        | 0.0267                                        | 0.0566                        | 0.1427                          | 0.1208                       | 0.5092              | 0.9466            | 0.1637 | 33.6638 |
| Internal validation criteria                                                                                                                                                    |                                               |                                               |                               |                                 |                              |                     |                   |        |         |
| Q <sup>2</sup> <sub>loo</sub>                                                                                                                                                   | R <sup>2</sup> -Q <sup>2</sup> <sub>loo</sub> | RMSE <sub>cv</sub>                            | MAE <sub>cv</sub>             | PRESS <sub>cv</sub>             | CCC <sub>cv</sub>            |                     |                   |        |         |
| 0.8410                                                                                                                                                                          | 0.0576                                        | 0.1787                                        | 0.1551                        | 0.7983                          | 0.9171                       |                     |                   |        |         |
| External validation criteria                                                                                                                                                    |                                               |                                               |                               |                                 |                              |                     |                   |        |         |
| RMSE <sub>ext</sub>                                                                                                                                                             | MAE <sub>ext</sub>                            | PRESS <sub>ext</sub>                          | R <sup>2</sup> <sub>ext</sub> | R <sup>2</sup> <sub>m(av)</sub> | ΔR <sup>2</sup> <sub>m</sub> | CCC <sub>extr</sub> |                   |        |         |
| 0.2609                                                                                                                                                                          | 0.2259                                        | 0.5448                                        | 0.6303                        | 0.6453                          | 0.1780                       | 0.7778              |                   |        |         |
| R <sup>2</sup> – The Coefficient of Determination; R <sup>2</sup> <sub>adj</sub> – adjusted R <sup>2</sup>                                                                      |                                               |                                               |                               |                                 |                              |                     |                   |        |         |
| LOF – Lack-of-fit                                                                                                                                                               |                                               |                                               |                               |                                 |                              |                     |                   |        |         |
| LOO – Leave One Out                                                                                                                                                             |                                               |                                               |                               |                                 |                              |                     |                   |        |         |
| RMSE – Root Mean Square Error; RMSE <sub>tr</sub> – for training set, RMSE <sub>cv</sub> – for internal validation; RMSE <sub>ext</sub> – for external validation               |                                               |                                               |                               |                                 |                              |                     |                   |        |         |
| MAE – Mean Absolute Error; MAE <sub>tr</sub> – for training set, MAE <sub>cv</sub> – for internal validation                                                                    |                                               |                                               |                               |                                 |                              |                     |                   |        |         |
| RSS – Residual Sum of Squares                                                                                                                                                   |                                               |                                               |                               |                                 |                              |                     |                   |        |         |
| CCC – The Concordance Correlation Coefficient; CCC <sub>tr</sub> – for training set, CCC <sub>cv</sub> – for internal validation, CCC <sub>extr</sub> – for external validation |                                               |                                               |                               |                                 |                              |                     |                   |        |         |
| s – Standard Deviation                                                                                                                                                          |                                               |                                               |                               |                                 |                              |                     |                   |        |         |
| Sp – Split                                                                                                                                                                      |                                               |                                               |                               |                                 |                              |                     |                   |        |         |
| PRESS – The Predicted Residual Error Sum of Squares; PRESS <sub>cv</sub> – for internal validation; PRESS <sub>ext</sub> – for external validation                              |                                               |                                               |                               |                                 |                              |                     |                   |        |         |
| R <sup>2</sup> <sub>m</sub> , R <sup>2</sup> <sub>m(av)</sub> , ΔR <sup>2</sup> <sub>m</sub> – [49,50]                                                                          |                                               |                                               |                               |                                 |                              |                     |                   |        |         |

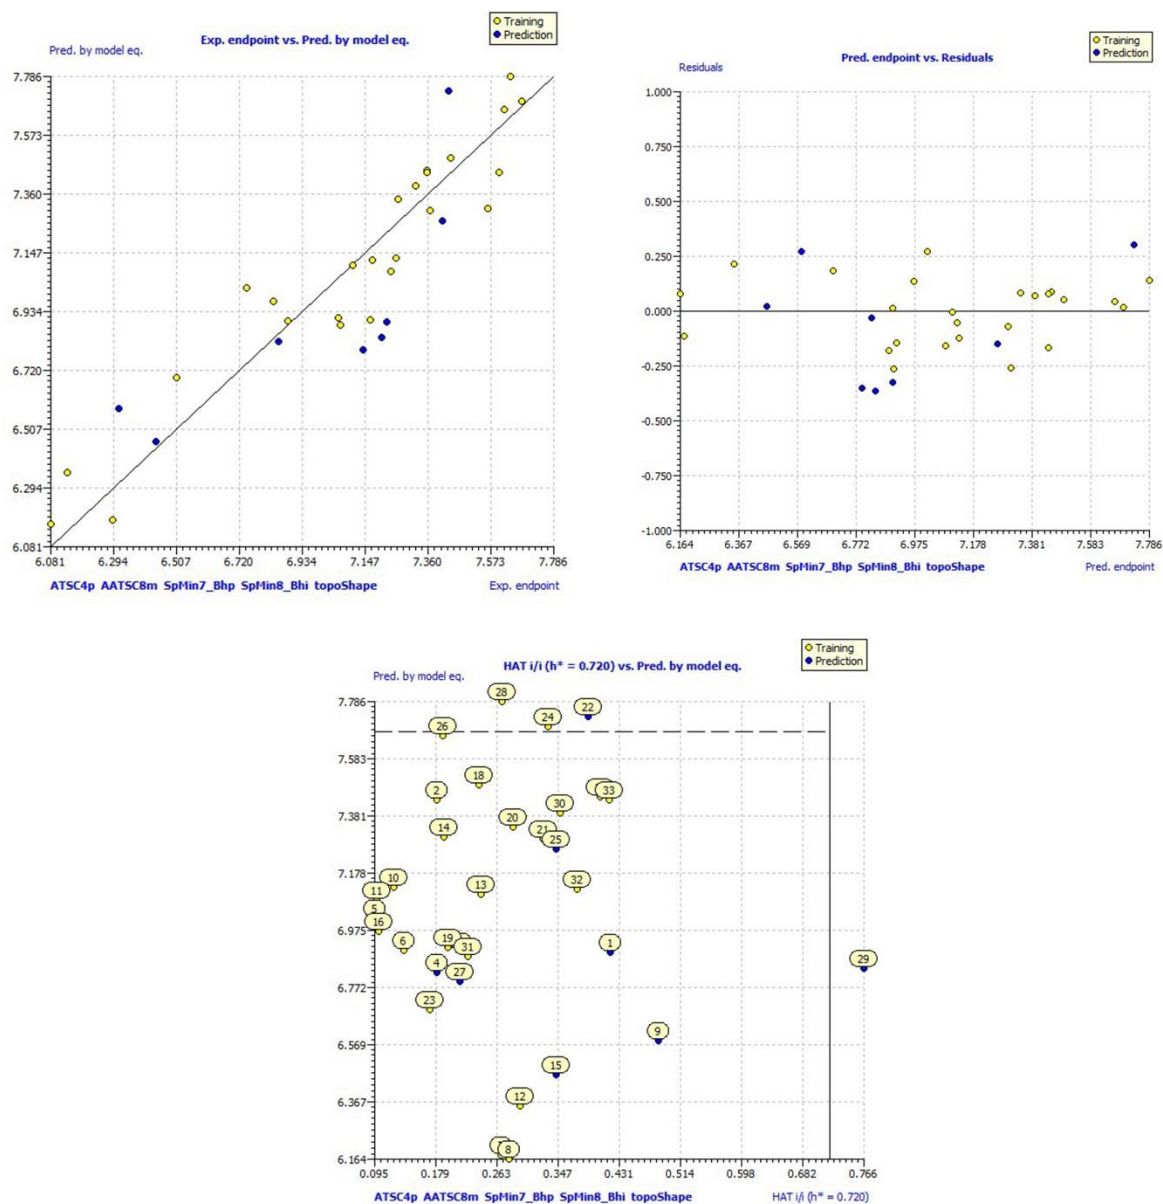

Figure S1. Above left) Graphical representation of developed QSAR model with GA-MLR method for split 3; Above right) Difference between experimental and calculated pKi values; Bellow) Graphical representation of applicability domain established for split 3.

Table S4. The list of SAKs together with their correlation weights for the three runs of the Monte Carlo optimization.

| SA           | CW(SA)   |          |          |
|--------------|----------|----------|----------|--------------|----------|----------|----------|--------------|----------|----------|----------|--------------|----------|----------|----------|
|              | Run 1    | Run 2    | Run 3    |              | Run 1    | Run 2    | Run 3    |              | Run 1    | Run 2    | Run 3    |              | Run 1    | Run 2    | Run 3    |
| 10011001000  | 0.35642  | 0.23382  | 0.26157  | EC0-C...2... | 0.06835  | 0.27859  | 0.09176  | P4E0F...1-.. | 0.57325  | 0.36197  | 0.00238  | S3E0C...6-.. | 0.42114  | 0.09365  | 1.42081  |
| (... (.....  | -0.69934 | -0.84196 | -0.86727 | EC0-C...3... | 0.08216  | 0.32373  | -0.12695 | P4E0F...3-.. | 0.17643  | -0.5171  | 0.17985  | S3E0C...7-.. | -0.06135 | -0.03479 | 0.45387  |
| (.....       | -0.96877 | 0.13154  | 0.03524  | EC0-C...4... | 0.32932  | 0.1743   | 0.33224  | P4E0F...4-.. | 0.15862  | 0.34736  | 0.00274  | S3E0C...8-.. | 1.42208  | 0.08211  | -0.24504 |
| (...C...(... | -0.56963 | -0.23779 | 0.11164  | EC0-F...1... | 0.31893  | 0.03891  | 0.35164  | P4E0N...11-. | -0.39943 | -0.15051 | 0.29021  | S3E0C...9-.. | 0.27386  | 0.71778  | 0.45792  |
| (...F...(... | 0.13968  | 0.40324  | 0.39255  | EC0-N...2... | -0.89611 | -0.10668 | 0.21018  | P4E0N...2-.. | 0.47432  | 0.41226  | 0.46791  | S3E0F...3-.. | 0.0182   | 0.21118  | 0.14754  |
| (...N...(... | 0.08117  | -0.20043 | 0.37089  | EC0-N...3... | 0.38623  | 0.37009  | 0.45651  | P4E0N...3-.. | 0.22047  | 0.25224  | 0.44858  | S3E0F...4-.. | 0.6034   | 0.12524  | 0.2638   |
| (...c...(... | 2.22696  | 0.6362   | 0.56735  | EC0-O...1... | 3.57941  | 1.29558  | 0.57899  | P4E0N...6-.. | 0.30207  | 0.15962  | 0.34477  | S3E0F...5-.. | 0.52848  | 0.07988  | 0.35287  |
| +++F---B2==  | -0.95197 | -0.78488 | 0.11804  | Cmax.2.....  | 0.84673  | -0.74003 | -0.31991 | P4E0N...8-.. | 0.07336  | 0.13161  | 0.69344  | S3E0N...0-.. | 0.7391   | 0.27477  | 0.9025   |
| +++F---N==   | 0.68268  | -0.55718 | 0.46757  | HALO10000000 | 0.53343  | -0.74754 | -0.57033 | P4E0O...0-.. | 0.057    | 2.19436  | 0.11251  | S3E0N...12-. | 0.05738  | 0.39593  | -0.08657 |
| +++F---O==   | 0.70662  | 0.26801  | 0.68831  | N...(.....   | 0.05753  | -0.87819 | 0.04487  | P4E0O...1-.. | 0.42126  | -0.77726 | 2.16569  | S3E0N...13-. | 2.28487  | 0.47296  | 0.34752  |
| +++N---B2==  | 1.49587  | 1.68384  | 0.1278   | N...(1...    | 1.32681  | 0.36892  | 0.22079  | P4E0O...4-.. | 0.31017  | 0.45249  | 0.36752  | S3E0N...14-. | 0.03332  | 2.11362  | 0.04791  |
| +++N---O==   | 1.26051  | -0.61814 | -0.10939 | N...(C...    | 1.04832  | 0.22157  | -0.9545  | NNE0C...100- | -0.64284 | 0.46327  | 0.28993  | S3E0N...16-. | -0.8916  | 0.11312  | -0.10556 |
| +++O---B2==  | 0.21525  | 1.34551  | 0.28271  | N.....       | -0.04657 | 0.03809  | 0.62252  | NNE0C...109- | 1.17197  | 1.31417  | 0.11364  | S3E0N...4-.. | 0.25972  | 0.27004  | 1.24304  |
| 1...(.....   | 0.39138  | 0.08809  | 0.47401  | N...C.....   | 0.07658  | 0.13319  | 0.15538  | NNE0C...209- | -0.07674 | 0.3688   | -0.11826 | S3E0N...5-.. | 2.30113  | 0.15458  | 0.1524   |
| 1.....       | 0.05388  | 0.10762  | 0.12612  | O...(.....   | 2.11717  | 0.19829  | 0.1525   | NNE0C...218- | 0.29355  | 1.4815   | 0.37006  | S3E0N...6-.. | 0.15514  | 0.47705  | 0.35691  |
| 1...C...(... | 0.49847  | 0.20937  | 0.2968   | O...(N...    | -0.49479 | 2.3063   | 0.41785  | NNE0C...309- | 3.6671   | 0.86136  | 0.746    | S3E0N...8-.. | 0.01286  | 0.07288  | 0.13773  |
| 1...c...(... | 1.20547  | 0.2797   | 0.49381  | O.....       | -0.09234 | 1.85565  | 0.34035  | NNE0C...318- | 0.34766  | 1.3983   | 0.17262  | S3E0O...1-.. | 0.30786  | 0.15226  | 0.48253  |
| 2...(.....   | 0.82073  | -0.0558  | 2.1363   | O...=...(... | 0.6219   | 0.0374   | 0.24402  | NNE0C...327- | 0.14206  | 0.07528  | -0.82729 | S3E0O...2-.. | 0.34448  | 0.16025  | 0.49362  |
| 2.....       | 4.43025  | 1.04778  | -0.39335 | O...=.....   | 1.98294  | 0.26002  | 0.11311  | NNE0C...409- | -0.08408 | 0.06737  | 0.46547  | S3E0O...3-.. | 0.54006  | 0.07351  | 0.2679   |
| 2...n...(... | -0.78447 | 0.64603  | 0.26353  | O...=...C... | 0.17137  | -0.85878 | 0.28021  | NNE0F...109- | 0.17104  | 0.04266  | 0.2175   | S3E0O...4-.. | 0.4231   | 0.16047  | 0.05388  |
| 2...n...1... | 0.01272  | 0.31054  | 0.09959  | P2E0C...0-.. | 0.08126  | -0.31499 | -0.29861 | NNE0N...218- | 0.15127  | -0.36304 | 0.87293  | S3E0O...5-.. | 0.29197  | 0.46461  | 0.31694  |
| =...(.....   | 2.19753  | 0.0667   | 2.25705  | P2E0C...1-.. | 0.45085  | 0.17831  | 0.18451  | NNE0N...327- | 1.12277  | 1.33325  | -0.07433 | Nmax.1.....  | 0.04448  | 0.33102  | 2.54719  |
| =.....       | 1.15916  | 1.30845  | 1.0621   | P2E0C...2-.. | 0.41904  | 0.49248  | 0.25811  | NNE0O...109- | 1.49314  | 0.29791  | 0.55741  | Omax.1.....  | 0.04719  | 0.57638  | 1.0932   |
| =...C...(... | 0.34704  | -0.6723  | 0.40252  | P2E0F...1-.. | 0.29529  | 0.47325  | 0.03052  | NOSP11000000 | 0.05576  | 3.46448  | 0.04009  | Smax.0.....  | 2.74095  | 1.41092  | 0.25848  |
| =...O...(... | 2.06223  | -0.41614 | 0.01346  | P2E0F...2-.. | 0.13896  | 0.43325  | 0.10709  | S2E0C...0-.. | -0.61396 | 0.13923  | 0.30852  | c...(.....   | 0.45368  | 0.42124  | 0.29755  |
| C...(.....   | 0.21444  | -0.99758 | 0.20839  | P2E0N...1-.. | 1.74764  | 1.55486  | 2.48098  | S2E0C...1-.. | 0.47025  | -1.39869 | -0.05404 | c...(1...    | -0.19454 | 0.19985  | 0.23577  |
| C...(1...    | 0.10565  | 1.47484  | 0.06912  | P2E0N...2-.. | 1.4666   | 0.15504  | -0.20153 | S2E0C...10-. | 0.47835  | -0.00342 | 0.29249  | c...(2...    | 0.37061  | 2.14944  | 0.27224  |
| C...(2...    | 0.18099  | -0.56178 | 0.4894   | P2E0O...1-.. | 0.20798  | 0.82551  | -1.04639 | S2E0C...2-.. | 0.32619  | 0.23884  | 0.25825  | c...(C...    | -0.46174 | 0.2322   | -0.43361 |
| C...(=...    | 1.221    | 2.09654  | 0.37596  | P3E0C...0-.. | 0.06508  | 0.27198  | 0.45199  | S2E0C...3-.. | 0.31522  | 1.76242  | 0.19784  | c...(F...    | 0.29454  | 0.14981  | 0.34182  |
| C...(C...    | 0.81828  | 0.06949  | 0.06015  | P3E0C...1-.. | 0.01581  | 0.01397  | 0.09111  | S2E0C...4-.. | 0.23593  | 0.4571   | 0.41564  | c...(C...    | 0.3523   | -0.07719 | 0.28375  |
| C.....       | 0.11595  | 0.11628  | 0.33512  | P3E0C...2-.. | 0.2558   | -0.5124  | 0.06587  | S2E0C...5-.. | 0.31377  | 0.37784  | 0.25622  | c.....       | 0.07358  | 1.38156  | 1.55114  |

|              |          |          |          |              |          |          |          |              |          |          |          |              |          |          |          |
|--------------|----------|----------|----------|--------------|----------|----------|----------|--------------|----------|----------|----------|--------------|----------|----------|----------|
| C...1...(... | 0.25821  | 0.52842  | 0.10767  | P3E0C...3-.. | 0.09259  | 0.27636  | 0.30663  | S2E0C...6-.. | 0.35862  | 2.18222  | 0.20959  | c...1...(... | 0.05688  | -0.85527 | -0.75725 |
| C...1.....   | 2.27243  | 0.40898  | 0.15764  | P3E0C...4-.. | 0.04194  | 0.3519   | 0.24459  | S2E0C...7-.. | 0.46482  | 0.05107  | 0.26483  | c...1.....   | 0.07527  | 0.31251  | 0.00899  |
| C...1...C... | 0.05744  | -0.67912 | 1.45991  | P3E0C...5-.. | -0.56098 | -0.74197 | 0.19802  | S2E0C...8-.. | 0.15625  | 0.35305  | -0.08459 | c...1...C... | 0.04804  | 0.01228  | 0.44426  |
| C...=.....   | 0.08516  | -0.6696  | -0.99787 | P3E0C...6-.. | 0.00703  | -0.67232 | 0.06252  | S2E0C...9-.. | 0.0809   | 0.16918  | -0.46553 | c...1...c... | 0.49148  | 0.05285  | 0.26015  |
| C...C...(... | 0.05632  | 0.41033  | 0.25372  | P3E0F...1-.. | 0.18912  | 0.06532  | 0.32588  | S2E0F...3-.. | 0.46974  | 2.43427  | 0.14793  | c...2...(... | 0.50067  | 0.20955  | 0.40148  |
| C...C.....   | 0.02848  | 0.71946  | 0.06079  | P3E0F...2-.. | 0.15443  | 0.19172  | 0.30608  | S2E0F...4-.. | 0.33784  | -0.93142 | -0.70104 | c...2.....   | -0.58122 | 0.12353  | -0.60989 |
| C...C...1... | 0.48766  | 0.00189  | 0.02743  | P3E0N...0-.. | 0.2693   | 0.15747  | 0.42546  | S2E0N...0-.. | 0.09003  | 1.13662  | 0.24434  | c...C.....   | 1.29384  | 0.5357   | 0.51677  |
| C...C...C... | 0.10981  | 0.51173  | -0.70427 | P3E0N...1-.. | 0.04254  | -0.28797 | 0.24309  | S2E0N...3-.. | 0.12065  | -0.23727 | 0.34401  | c...C...N... | 0.13042  | 0.40246  | 0.19186  |
| C...N...(... | 0.22709  | -0.45147 | -0.36093 | P3E0N...2-.. | 0.39199  | 0.13542  | -0.6324  | S2E0N...4-.. | 1.572    | 0.03204  | 0.23015  | c...F.....   | 0.29308  | -0.917   | 0.33253  |
| C...c...1... | 1.01399  | 0.29198  | 2.06871  | P3E0N...4-.. | -0.63613 | -0.30558 | 0.39532  | S2E0N...5-.. | 0.01559  | 0.13158  | 0.08442  | c...c...(... | 0.10978  | 0.15756  | 0.38781  |
| C3.....0...  | 0.35816  | 0.33401  | 0.34265  | P3E0N...5-.. | 0.31946  | 0.70975  | -0.72298 | S2E0N...9-.. | 1.64463  | 2.98021  | -1.02188 | c...c.....   | 0.35915  | -1.40403 | 0.33516  |
| C3.....1...  | 0.21109  | 0.37967  | -0.67726 | P3E0O...0-.. | 2.18431  | 0.22265  | 0.3951   | S2E0O...2-.. | 0.05195  | 1.34238  | 0.22009  | c...c...1... | 1.42864  | 0.48708  | 2.46116  |
| C4.....0...  | 0.88675  | 2.35239  | 0.19317  | P3E0O...1-.. | 0.4736   | -0.00274 | 0.12487  | S2E0O...3-.. | 0.21602  | 2.68812  | -0.12635 | c...c...2... | 1.1064   | 1.83059  | 0.32924  |
| C5...AH.1... | 1.4407   | 1.16884  | -0.58578 | P3E0O...2-.. | 0.38671  | 1.10868  | 0.48846  | S2E0O...4-.. | -0.84462 | 0.08312  | 0.27694  | c...c...c... | 0.73194  | 0.1231   | 0.03075  |
| C6...AH.2... | 0.62069  | 0.79755  | 2.29229  | P4E0C...0-.. | 0.23334  | -0.50918 | 0.43347  | S3E0C...0-.. | 0.23725  | 2.2      | 0.44356  | c...n...(... | 0.21933  | 0.11419  | -0.483   |
| C7.....0...  | 0.44636  | 0.58315  | -0.58661 | P4E0C...1-.. | 0.15703  | 0.46162  | 0.08541  | S3E0C...1-.. | -0.94406 | -0.51616 | -0.11402 | c...n...1... | -0.91501 | 0.15972  | 0.20265  |
| BOND10000000 | 0.23157  | 0.22905  | 3.63799  | P4E0C...10-  | 0.07118  | -0.79067 | 0.06161  | S3E0C...10-  | 0.42966  | 0.13324  | -0.81085 | n...(.....   | 0.54276  | 0.41577  | 0.23137  |
| F...(...(... | 0.17638  | 0.49309  | 0.42853  | P4E0C...11-  | -0.5278  | 0.22381  | 0.28658  | S3E0C...11-  | 0.21899  | -0.97581 | -0.08425 | n...(...c... | 0.33348  | 0.44934  | 0.43534  |
| F...(.....   | 0.12616  | 0.28559  | 0.04601  | P4E0C...12-  | 0.46511  | 0.18559  | -0.60763 | S3E0C...12-  | 0.14139  | -1.63927 | 0.33999  | n.....       | 1.34394  | 3.47203  | -0.23603 |
| F...(...1... | 0.34065  | -0.00683 | 0.31122  | P4E0C...16-  | 0.05473  | -0.79435 | 0.26642  | S3E0C...13-  | 0.25498  | 0.30074  | 1.18489  | n...1.....   | 0.15952  | 0.13782  | 0.20157  |
| F...(...2... | 1.6148   | 2.04746  | 1.83798  | P4E0C...2-.. | 0.30375  | 0.2152   | -0.71191 | S3E0C...14-  | 0.14064  | 2.41008  | 0.14859  | n...1...c... | 0.89217  | 0.09732  | -0.62111 |
| F...(...C... | 0.22404  | 0.14162  | -0.69696 | P4E0C...3-.. | 0.23043  | 0.40998  | 0.48976  | S3E0C...15-  | 1.04368  | 0.24378  | -0.01545 | n...2...(... | 0.02087  | 0.03464  | -0.53977 |
| F...(...F... | 0.06726  | 0.30888  | 0.31511  | P4E0C...4-.. | 0.28178  | 0.09912  | 0.17243  | S3E0C...2-.. | -0.66937 | 0.04288  | 0.16639  | n...2.....   | 0.27524  | 0.27284  | 0.05172  |
| F.....       | 0.00339  | 0.33487  | 0.56728  | P4E0C...6-.. | -0.92812 | 0.39666  | 0.33317  | S3E0C...3-.. | 0.30442  | 0.09547  | 0.2352   | n...2...c... | 0.34822  | 0.95933  | 2.33365  |
| F...c...1... | -0.20052 | -0.6753  | 0.10564  | P4E0C...7-.. | 0.39169  | 2.49583  | 2.03993  | S3E0C...4-.. | -0.05147 | 0.04231  | 0.31898  | n...c.....   | 0.14722  | 0.20698  | 0.42777  |
| EC0-C...1... | 2.20491  | 0.87997  | 0.28749  | P4E0C...8-.. | 0.25273  | 0.40714  | 0.19701  | S3E0C...5-.. | 0.29217  | 0.17515  | 0.01379  | n...c...2... | 0.32725  | 0.29946  | 0.19304  |

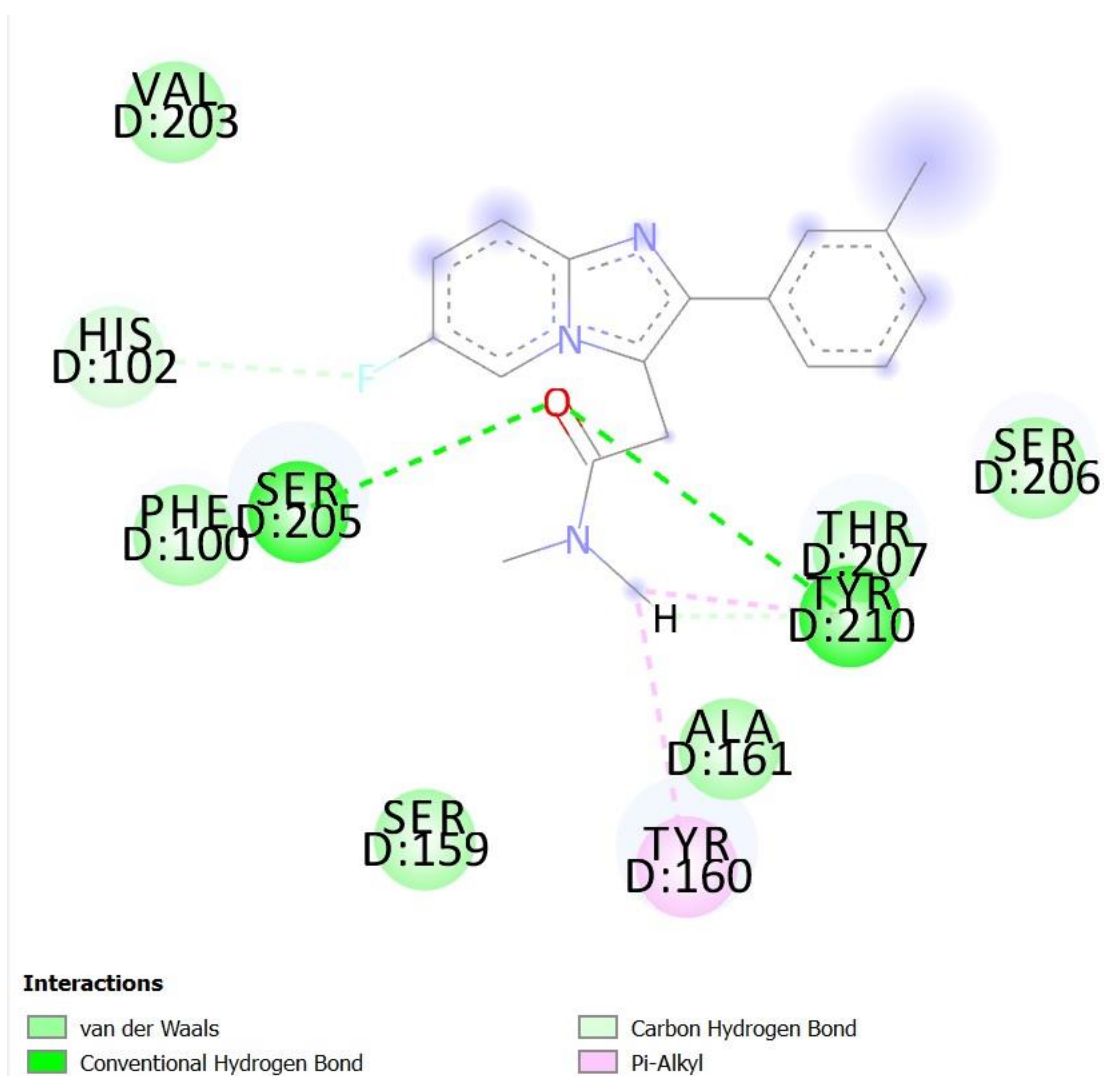

Figure S2. Two-dimensional representation of the interaction between molecule A and amino acids inside ionotropic GABA<sub>A</sub> receptor.

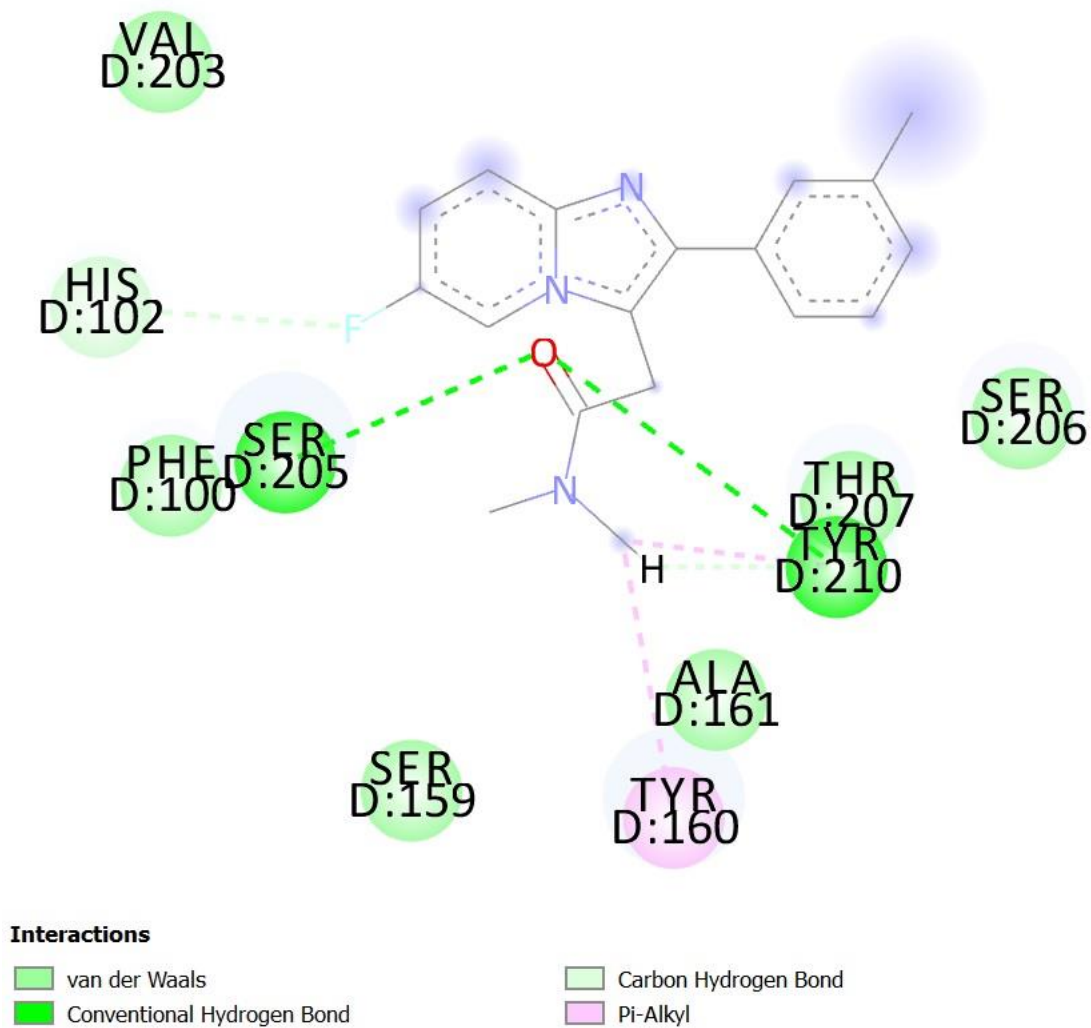

Figure S3. Two-dimensional representation of the interaction between molecule A1 and amino acids inside ionotropic GABA<sub>A</sub> receptor.

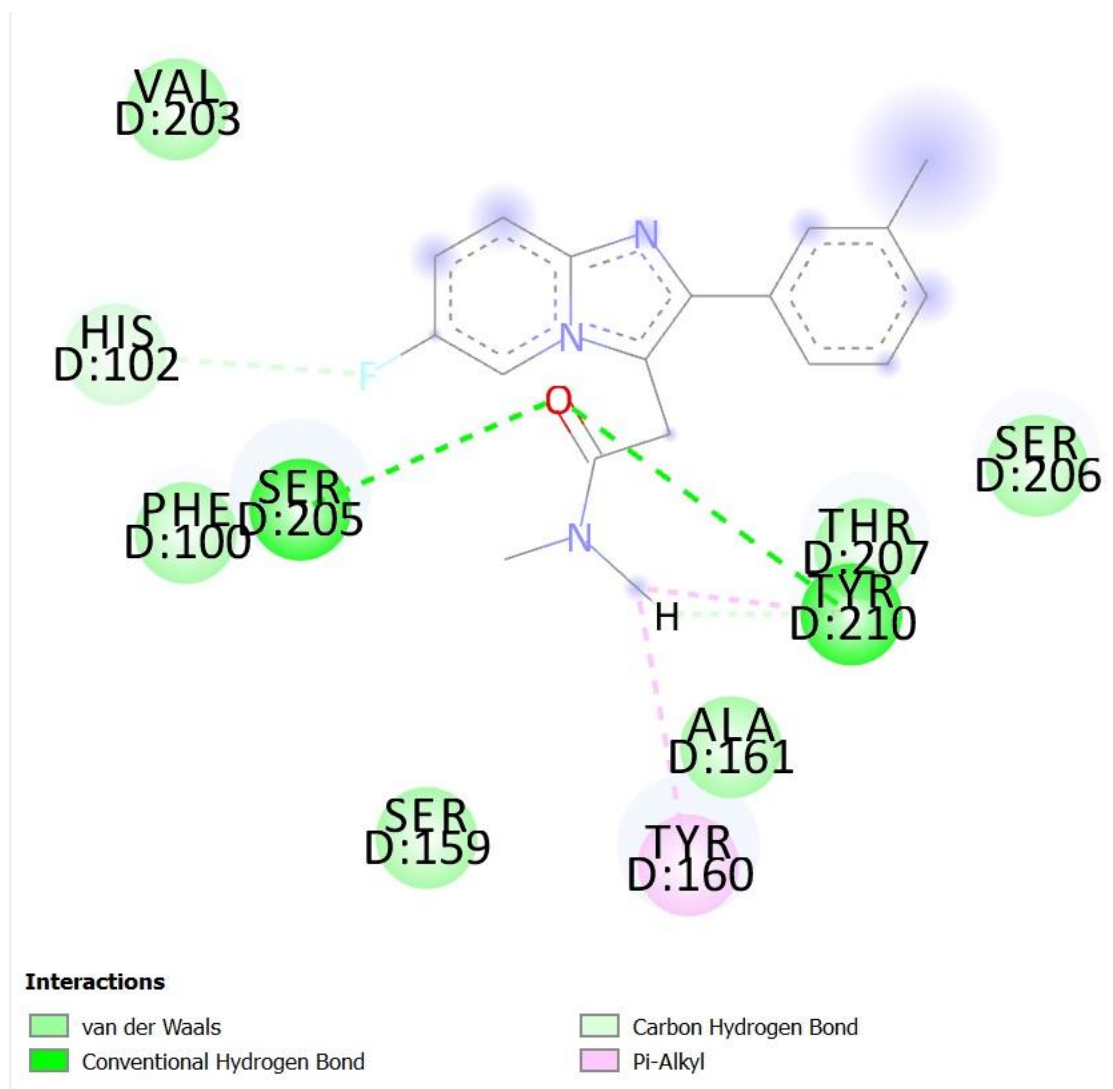

Figure S4. Two-dimensional representation of the interaction between molecule A2 and amino acids inside ionotropic GABA<sub>A</sub> receptor.

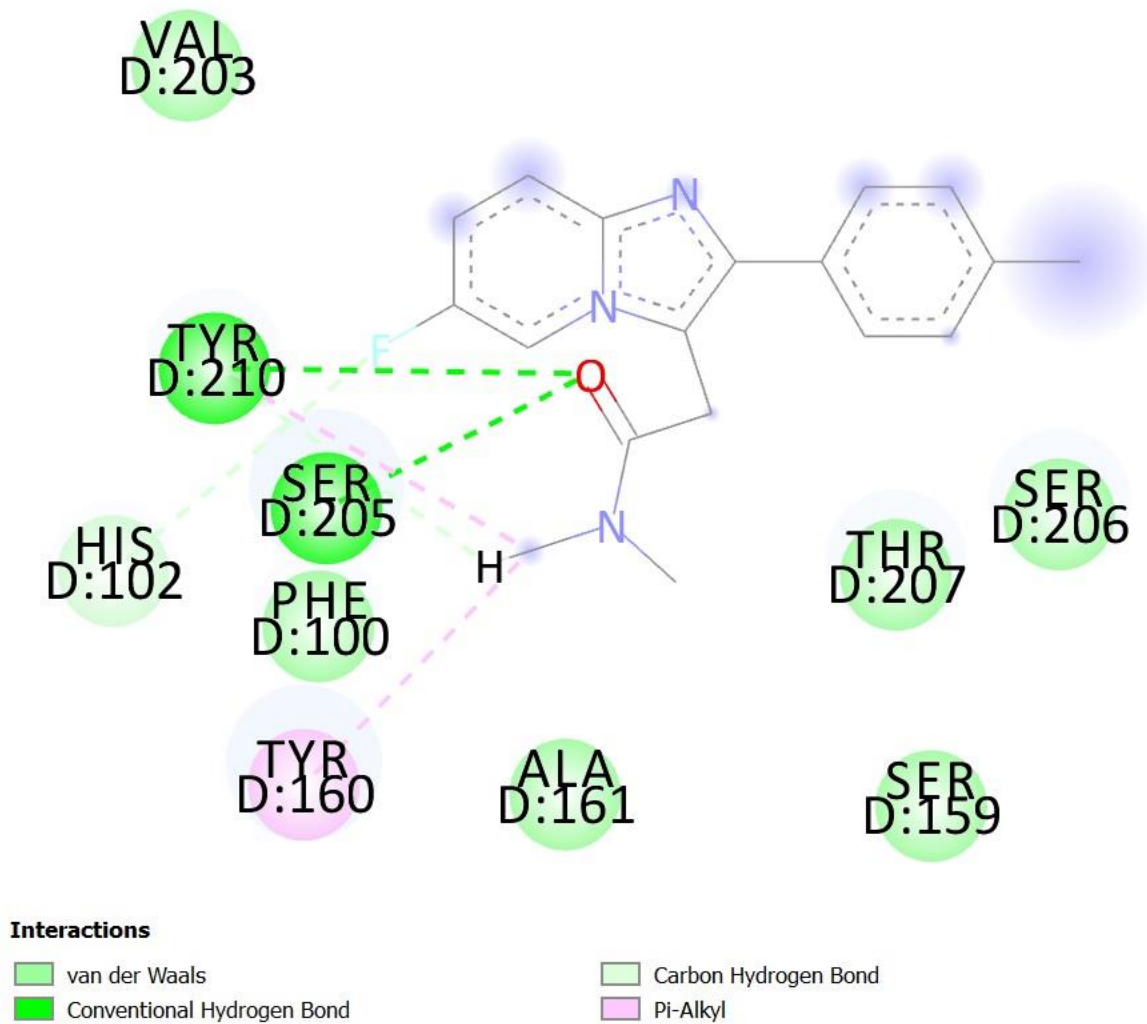

Figure S5. Two-dimensional representation of the interaction between molecule A3 and amino acids inside ionotropic GABA<sub>A</sub> receptor.



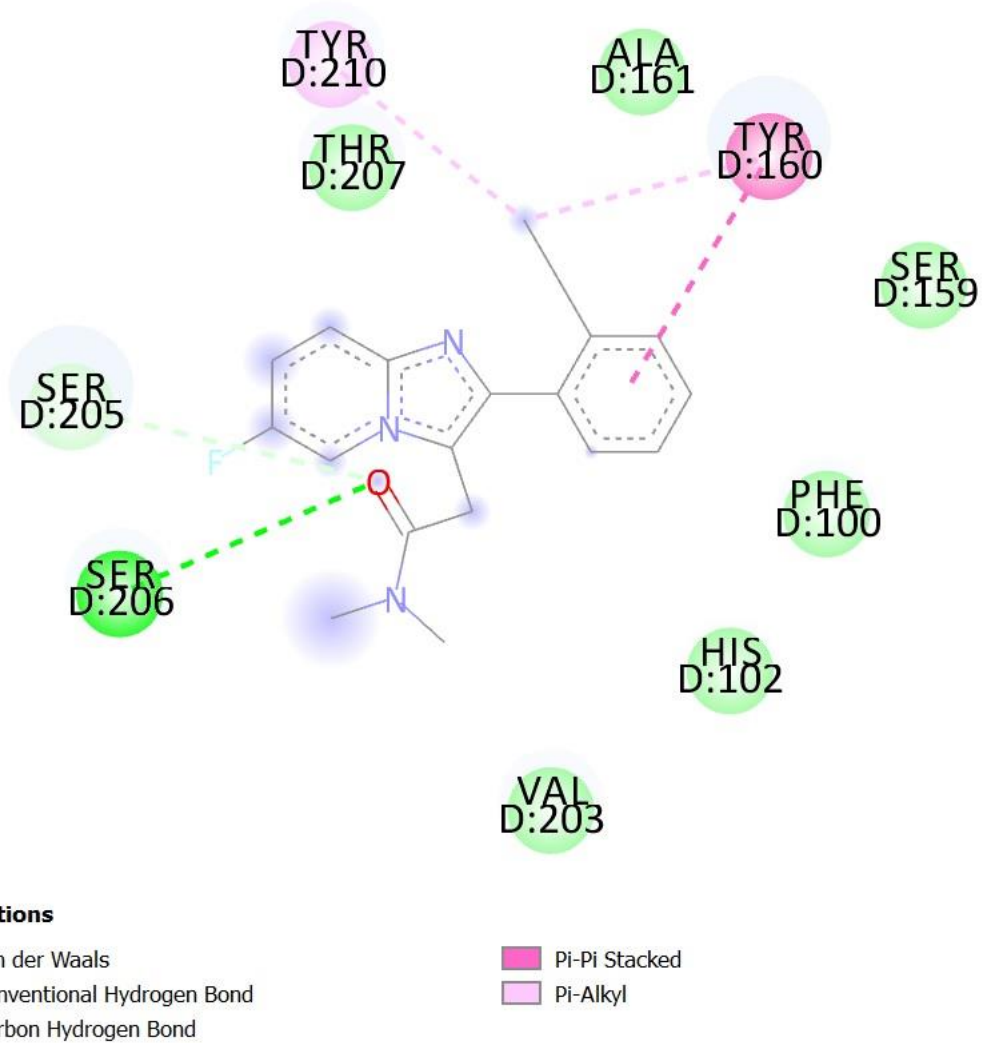

Figure S6. Two-dimensional representation of the interaction between molecule A4 and amino acids inside ionotropic GABA<sub>A</sub> receptor.

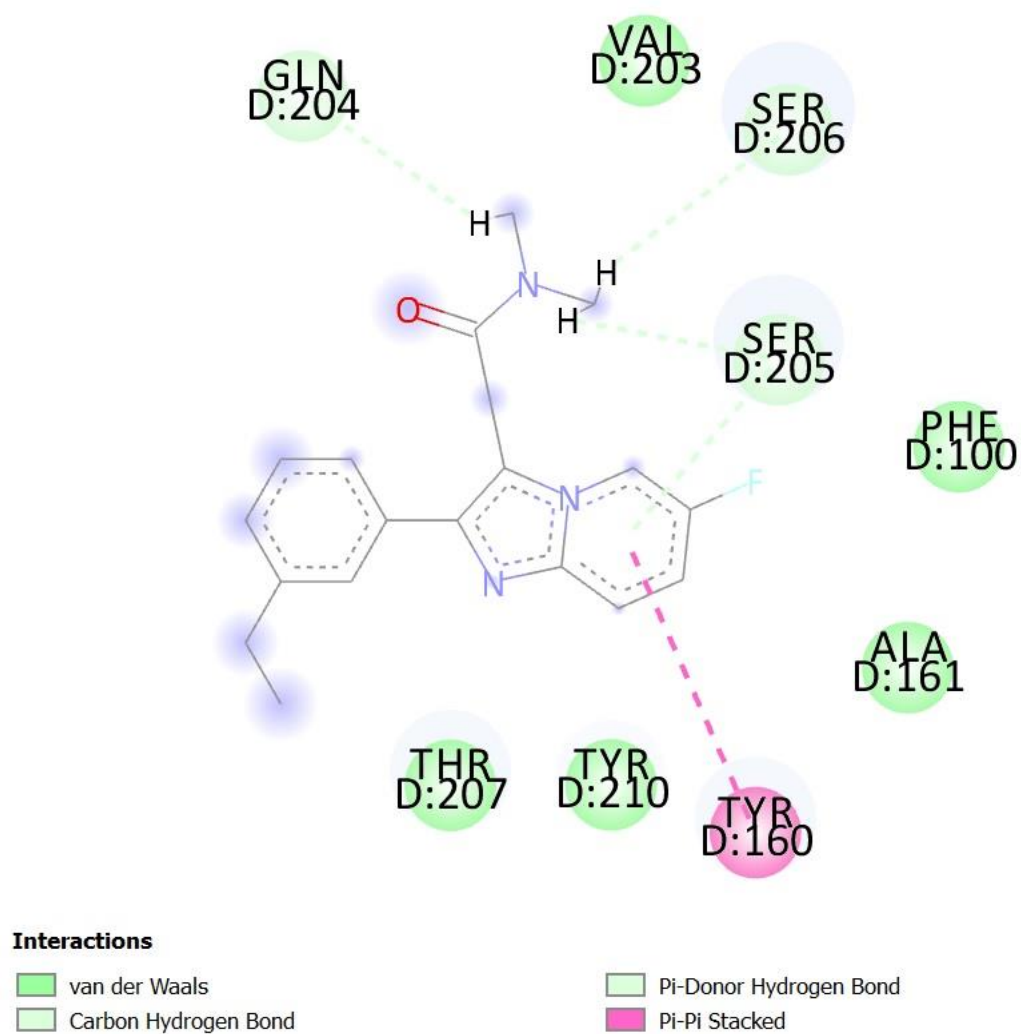

Figure S7. Two-dimensional representation of the interaction between molecule A5 and amino acids inside ionotropic GABA<sub>A</sub> receptor.

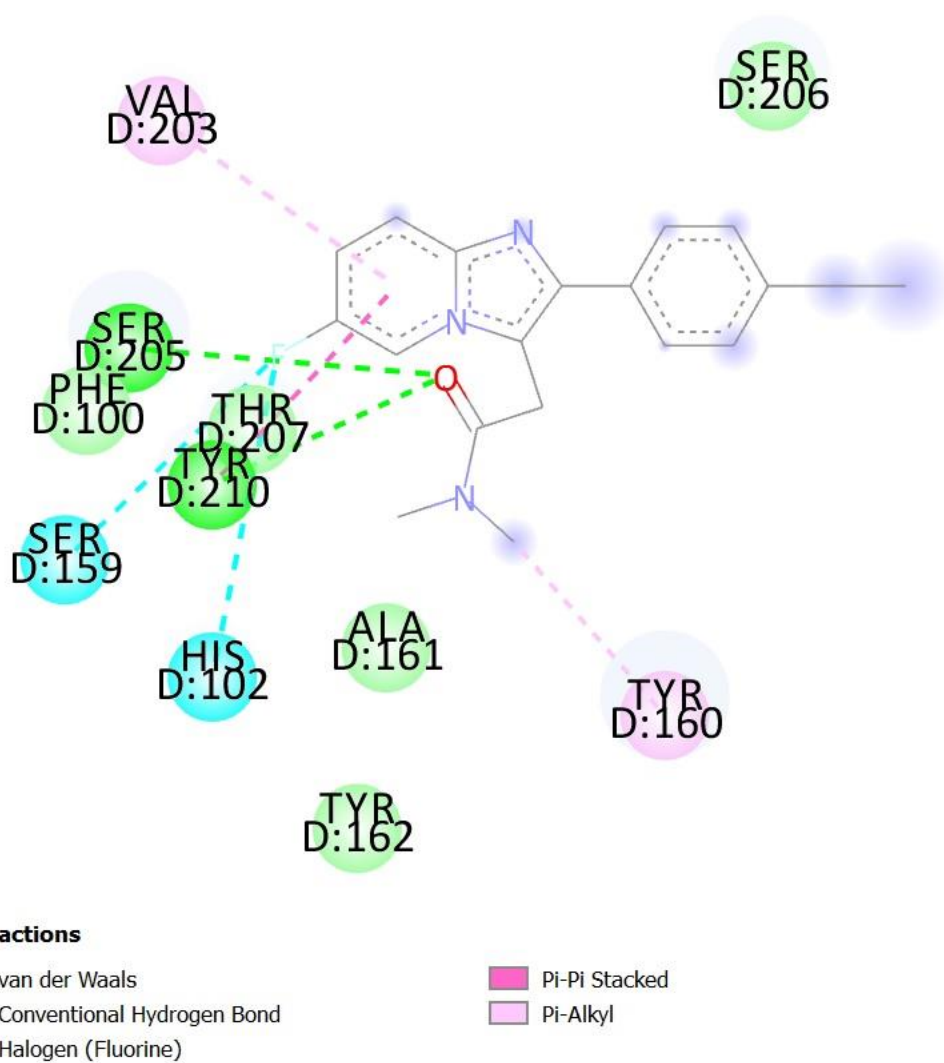

Figure S8. Two-dimensional representation of the interaction between molecule A6 and amino acids inside ionotropic GABA<sub>A</sub> receptor.

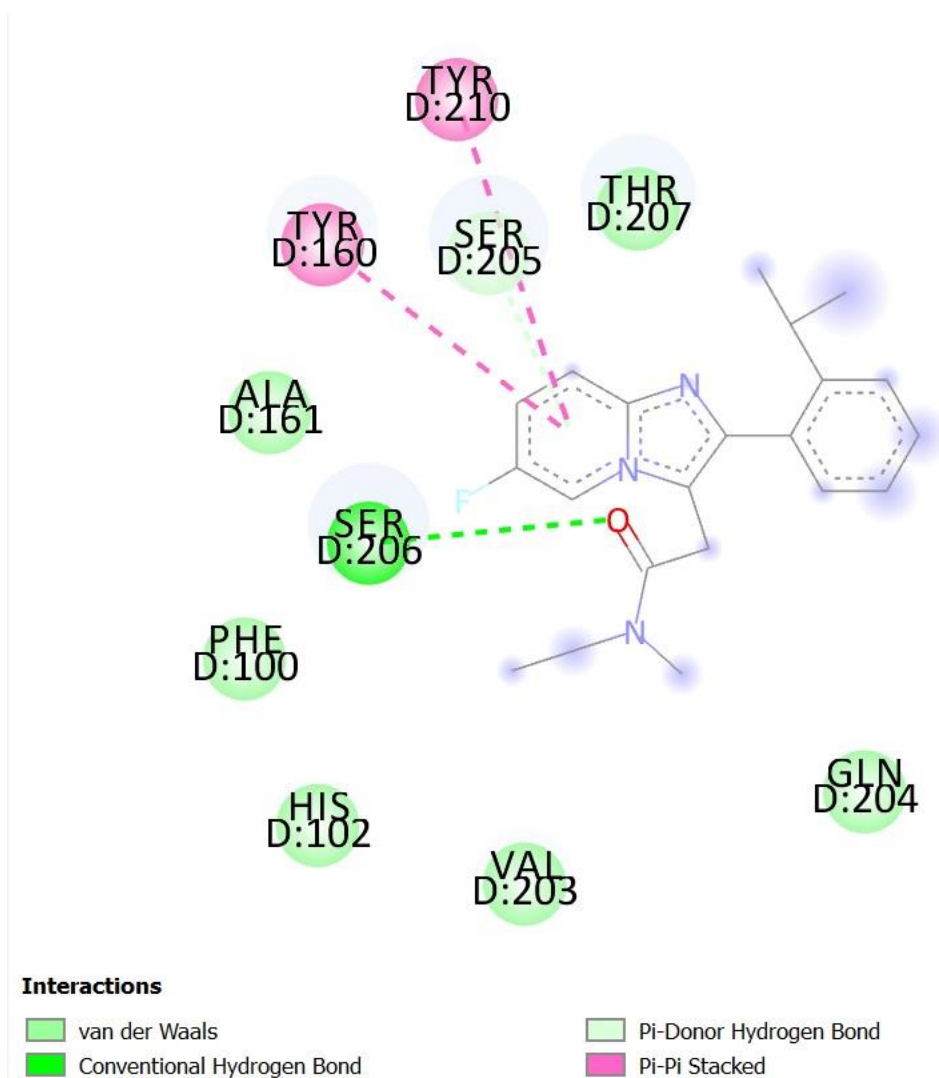

Figure S9. Two-dimensional representation of the interaction between molecule A7 and amino acids inside ionotropic GABA<sub>A</sub> receptor.

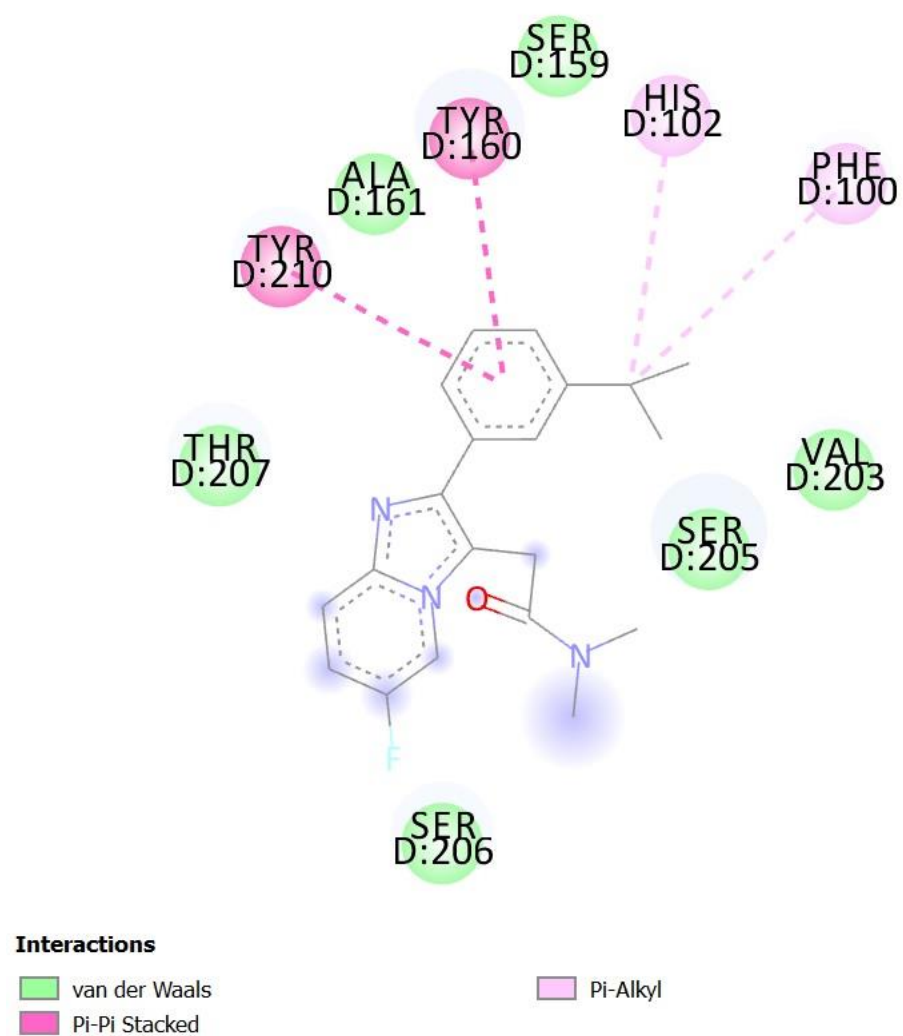

Figure S10. Two-dimensional representation of the interaction between molecule A8 and amino acids inside ionotropic GABA<sub>A</sub> receptor.

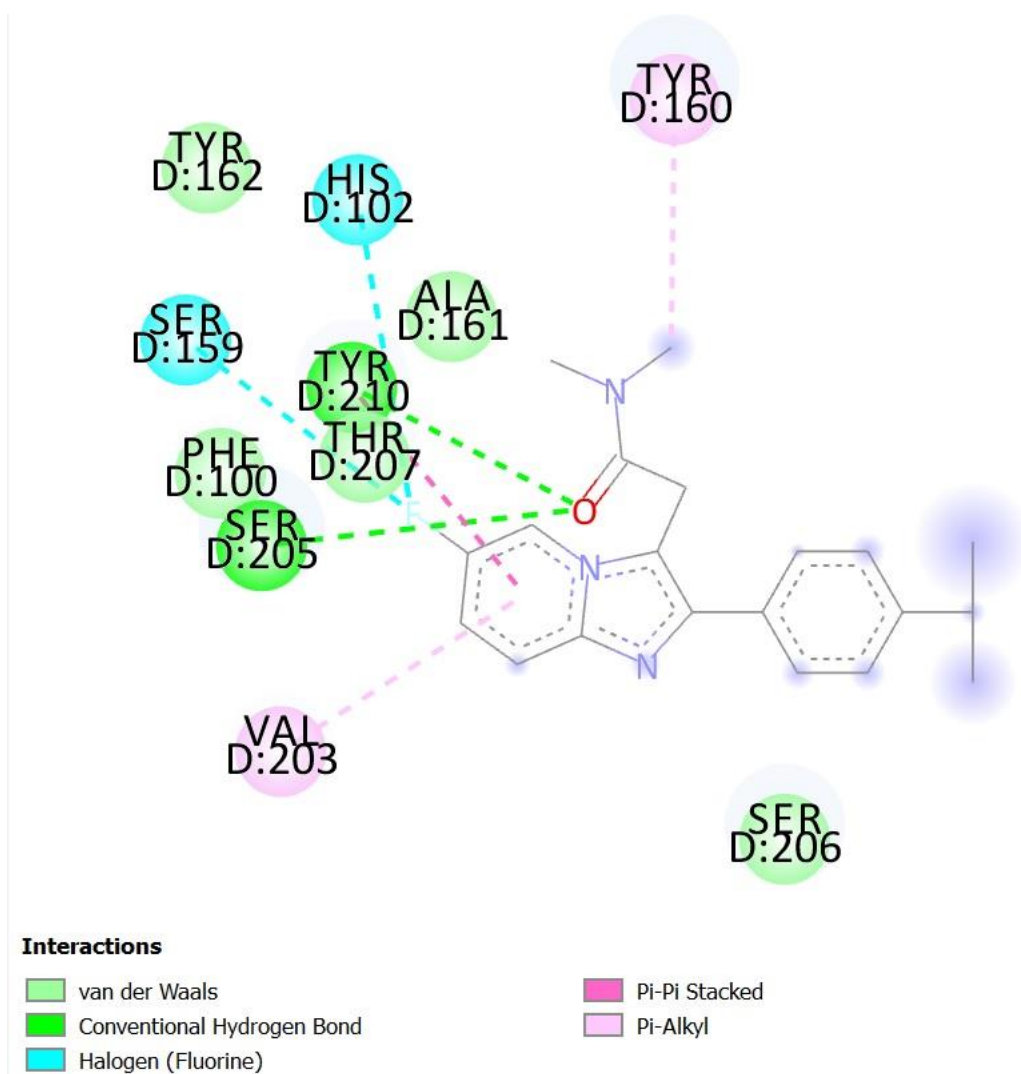

Figure S11. Two-dimensional representation of the interaction between molecule A9 and amino acids inside ionotropic GABA<sub>A</sub> receptor.

Table S5. Calculated physical-chemical parameters for drug-likeness evaluation.

| Molecule                | A        | A1                 | A2                 | A3                 | A4                 | A5                 | A5                 | A7                 | A8                 | A9                 |
|-------------------------|----------|--------------------|--------------------|--------------------|--------------------|--------------------|--------------------|--------------------|--------------------|--------------------|
| MW                      | 297.33   | 311.35             | 311.35             | 311.35             | 325.38             | 325.38             | 325.38             | 353.43             | 339.41             | 339.41             |
| #Heavy atoms            | 22       | 23                 | 23                 | 23                 | 24                 | 24                 | 24                 | 26                 | 25                 | 25                 |
| #Aromatic heavy atoms   | 15       | 15                 | 15                 | 15                 | 15                 | 15                 | 15                 | 15                 | 15                 | 15                 |
| Fraction Csp3           | 0.18     | 0.22               | 0.22               | 0.22               | 0.26               | 0.26               | 0.26               | 0.33               | 0.3                | 0.3                |
| #Rotatable bonds        | 4        | 4                  | 4                  | 4                  | 5                  | 5                  | 5                  | 6                  | 5                  | 5                  |
| #H-bond acceptors       | 3        | 3                  | 3                  | 3                  | 3                  | 3                  | 3                  | 3                  | 3                  | 3                  |
| #H-bond donors          | 0        | 0                  | 0                  | 0                  | 0                  | 0                  | 0                  | 0                  | 0                  | 0                  |
| MR                      | 83.07    | 88.03              | 88.03              | 88.03              | 92.84              | 92.84              | 92.84              | 102.46             | 97.65              | 97.65              |
| TPSA                    | 37.61    | 37.61              | 37.61              | 37.61              | 37.61              | 37.61              | 37.61              | 37.61              | 37.61              | 37.61              |
| iLOGP                   | 2.78     | 3.07               | 2.98               | 3.05               | 2.91               | 3.33               | 3.57               | 3.2                | 3.55               | 3.4                |
| XLOGP3                  | 2.96     | 3.32               | 3.32               | 3.32               | 3.75               | 3.75               | 3.75               | 4.45               | 4.08               | 4.08               |
| WLOGP                   | 3.19     | 3.5                | 3.5                | 3.5                | 3.75               | 3.75               | 3.75               | 4.7                | 4.31               | 4.31               |
| MLOGP                   | 2.27     | 2.51               | 2.51               | 2.51               | 2.74               | 2.74               | 2.74               | 3.18               | 2.96               | 2.96               |
| Silicos-IT Log P        | 2.74     | 3.25               | 3.25               | 3.25               | 3.64               | 3.64               | 3.64               | 4.26               | 3.86               | 3.86               |
| Consensus Log P         | 2.79     | 3.13               | 3.11               | 3.13               | 3.36               | 3.44               | 3.49               | 3.96               | 3.75               | 3.72               |
| ESOL Log S              | -3.79    | -4.08              | -4.08              | -4.08              | -4.35              | -4.35              | -4.35              | -4.87              | -4.63              | -4.63              |
| ESOL Solubility (mg/ml) | 4.84E-02 | 2.59E-02           | 2.59E-02           | 2.59E-02           | 1.45E-02           | 1.45E-02           | 1.45E-02           | 4.82E-03           | 7.98E-03           | 7.98E-03           |
| ESOL Solubility (mol/l) | 1.63E-04 | 8.31E-05           | 8.31E-05           | 8.31E-05           | 4.44E-05           | 4.44E-05           | 4.44E-05           | 1.36E-05           | 2.35E-05           | 2.35E-05           |
| ESOL Class              | Soluble  | Moderately soluble | Moderately soluble | Moderately soluble | Moderately soluble | Moderately soluble | Moderately soluble | Moderately soluble | Moderately soluble | Moderately soluble |
| Ali Log S               | -3.41    | -3.79              | -3.79              | -3.79              | -4.23              | -4.23              | -4.23              | -4.96              | -4.57              | -4.57              |
| Ali Solubility (mg/ml)  | 1.15E-01 | 5.09E-02           | 5.09E-02           | 5.09E-02           | 1.91E-02           | 1.91E-02           | 1.91E-02           | 3.89E-03           | 9.03E-03           | 9.03E-03           |

|                               |                    |                    |                    |                    |                    |                    |                    |                    |                    |                    |
|-------------------------------|--------------------|--------------------|--------------------|--------------------|--------------------|--------------------|--------------------|--------------------|--------------------|--------------------|
| Ali Solubility (mol/l)        | 3.87E-04           | 1.64E-04           | 1.64E-04           | 1.64E-04           | 5.86E-05           | 5.86E-05           | 5.86E-05           | 1.10E-05           | 2.66E-05           | 2.66E-05           |
| Ali Class                     | Soluble            | Soluble            | Soluble            | Soluble            | Moderately soluble | Moderately soluble | Moderately soluble | Moderately soluble | Moderately soluble | Moderately soluble |
| Silicos-IT LogSw              | -5.34              | -5.72              | -5.72              | -5.72              | -6.11              | -6.11              | -6.11              | -6.53              | -6.14              | -6.14              |
| Silicos-IT Solubility (mg/ml) | 1.37E-03           | 5.97E-04           | 5.97E-04           | 5.97E-04           | 2.50E-04           | 2.50E-04           | 2.50E-04           | 1.04E-04           | 2.48E-04           | 2.48E-04           |
| Silicos-IT Solubility (mol/l) | 4.60E-06           | 1.92E-06           | 1.92E-06           | 1.92E-06           | 7.69E-07           | 7.69E-07           | 7.69E-07           | 2.94E-07           | 7.29E-07           | 7.29E-07           |
| Silicos-IT class              | Moderately soluble | Moderately soluble | Moderately soluble | Moderately soluble | Poorly soluble     | Poorly soluble     | Poorly soluble     | Poorly soluble     | Poorly soluble     | Poorly soluble     |
| GI absorption                 | High               |
| BBB permeant                  | Yes                |
| Pgp substrate                 | No                 |
| CYP1A2 inhibitor              | Yes                |
| CYP2C19 inhibitor             | Yes                |
| CYP2C9 inhibitor              | Yes                |
| CYP2D6 inhibitor              | Yes                |
| CYP3A4 inhibitor              | No                 | Yes                |
| log Kp (cm/s)                 | -6.01              | -5.84              | -5.84              | -5.84              | -5.62              | -5.62              | -5.62              | -5.3               | -5.47              | -5.47              |
| Lipinski #violations          | 0                  | 0                  | 0                  | 0                  | 0                  | 0                  | 0                  | 0                  | 0                  | 0                  |
| Ghose #violations             | 0                  | 0                  | 0                  | 0                  | 0                  | 0                  | 0                  | 0                  | 0                  | 0                  |
| Veber #violations             | 0                  | 0                  | 0                  | 0                  | 0                  | 0                  | 0                  | 0                  | 0                  | 0                  |



|                             |      |      |      |      |      |      |      |      |      |      |
|-----------------------------|------|------|------|------|------|------|------|------|------|------|
| Egan<br>#violations         | 0    | 0    | 0    | 0    | 0    | 0    | 0    | 0    | 0    | 0    |
| Muegge<br>#violations       | 0    | 0    | 0    | 0    | 0    | 0    | 0    | 0    | 0    | 0    |
| Bioavailability Score       | 0.55 | 0.55 | 0.55 | 0.55 | 0.55 | 0.55 | 0.55 | 0.55 | 0.55 | 0.55 |
| PAINS<br>#alerts            | 0    | 0    | 0    | 0    | 0    | 0    | 0    | 0    | 0    | 0    |
| Brenk<br>#alerts            | 0    | 0    | 0    | 0    | 0    | 0    | 0    | 0    | 0    | 0    |
| Leadlikeness<br>#violations | 0    | 0    | 0    | 0    | 1    | 1    | 1    | 2    | 1    | 1    |
| Synthetic<br>Accessibility  | 2.76 | 2.9  | 2.93 | 2.88 | 3.02 | 3.02 | 2.97 | 3.22 | 3.13 | 3.08 |

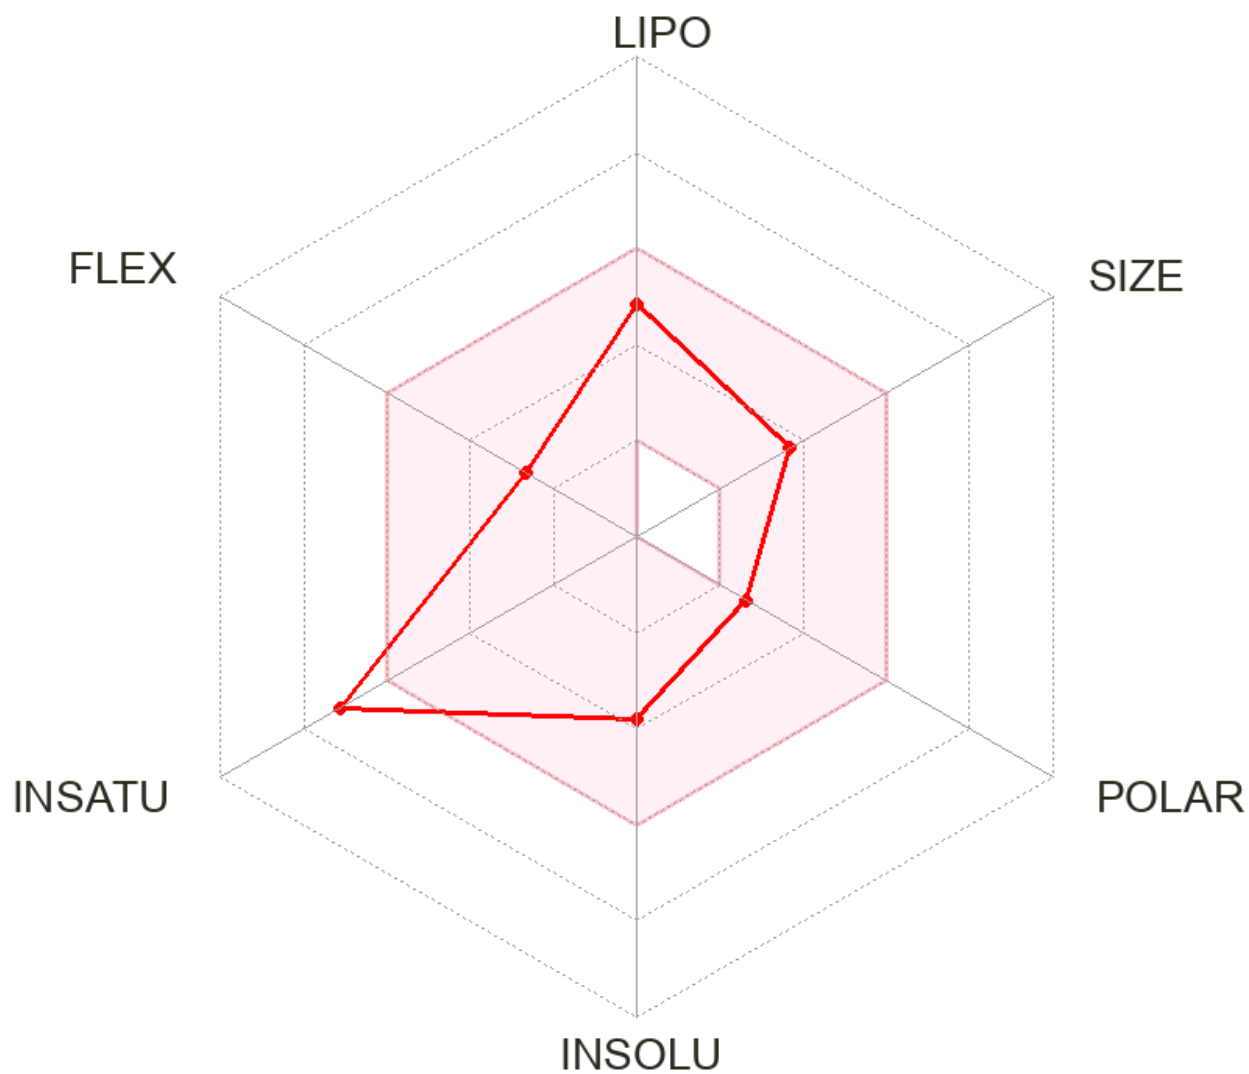

Figure S12. Graphical representations of molecule A important physico-chemical features – Bioavailability Radar. The pink area represents the optimal range for each properties (lipophilicity: XLOGP3 between -0.7 and +5.0, size: MW between 150 and 500 g/mol, polarity: TPSA between 20 and 130 Å<sup>2</sup>, solubility: log S not higher than 6, saturation:

fraction of carbons in the  $sp^3$  hybridization not less than 0.25, and flexibility: no more than 9 rotatable bonds.

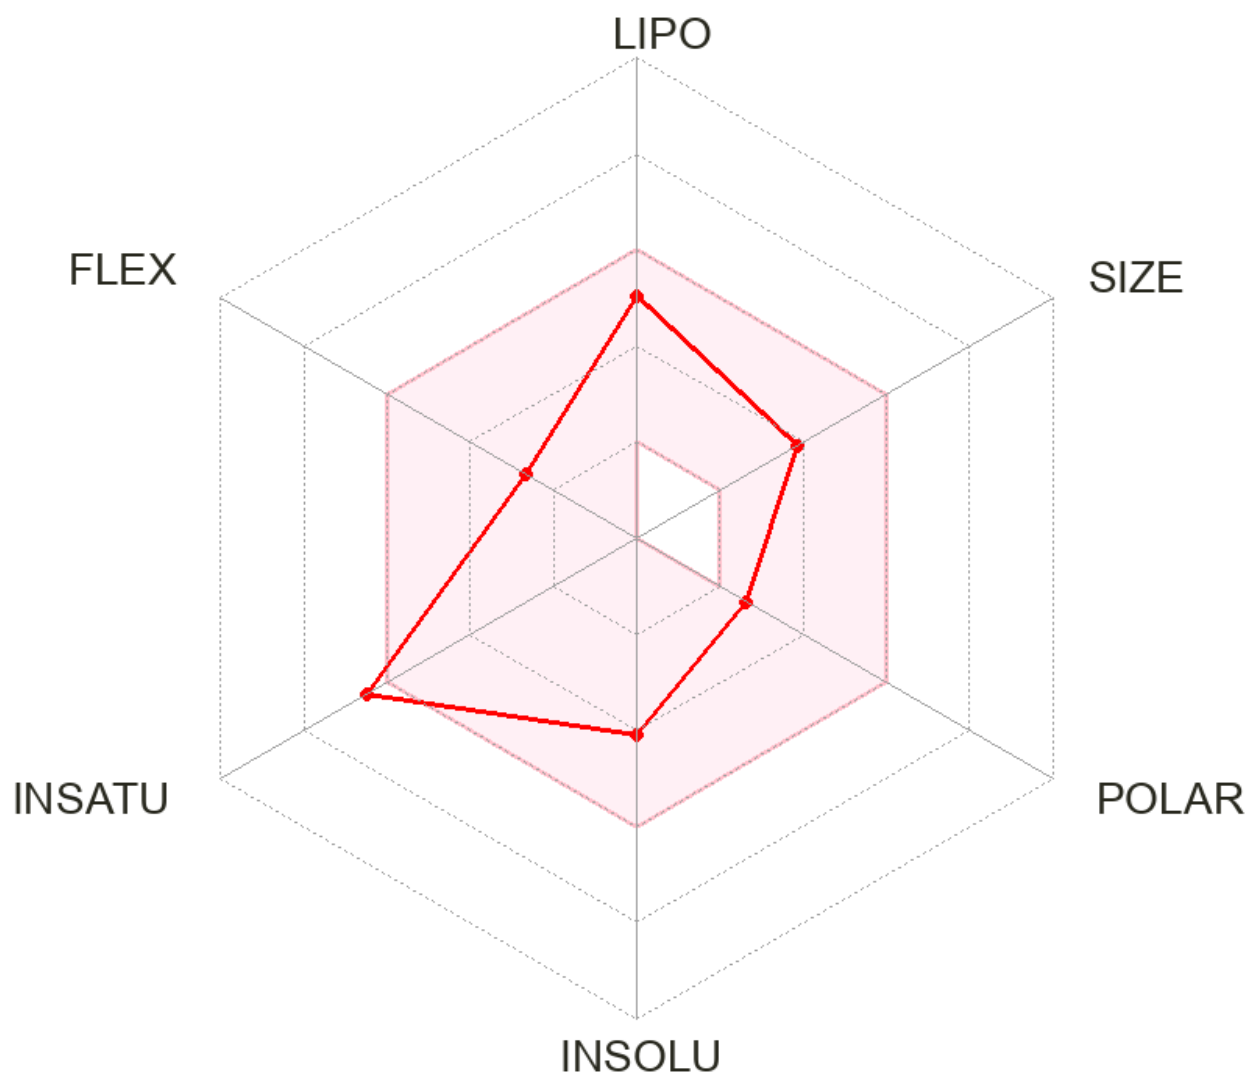

Figure S13. Graphical representations of molecule A1 important physico-chemical features – Bioavailability Radar. The pink area represents the optimal range for each

properties (lipophilicity: XLOGP3 between -0.7 and +5.0, size: MW between 150 and 500 g/mol, polarity: TPSA between 20 and 130 Å<sup>2</sup>, solubility: log S not higher than 6, saturation: fraction of carbons in the sp<sup>3</sup> hybridization not less than 0.25, and flexibility: no more than 9 rotatable bonds.

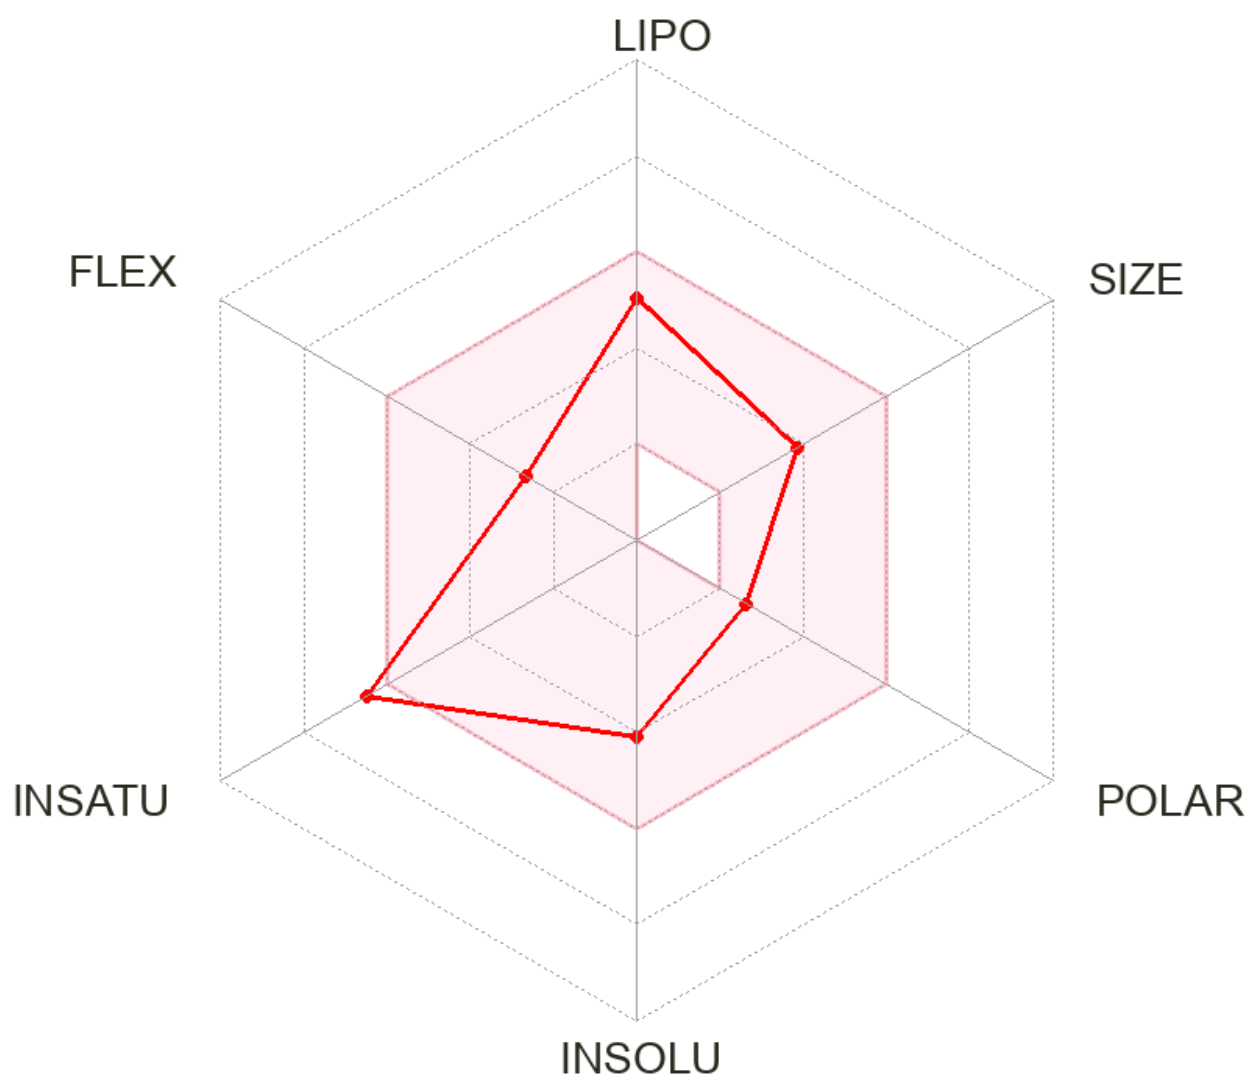

Figure S14. Graphical representations of molecule A2 important physico-chemical features – Bioavailability Radar. The pink area represents the optimal range for each properties (lipophilicity: XLOGP3 between -0.7 and +5.0, size: MW between 150 and 500 g/mol, polarity: TPSA between 20 and 130 Å<sup>2</sup>, solubility: log S not higher than 6, saturation: fraction of carbons in the sp<sup>3</sup> hybridization not less than 0.25, and flexibility: no more than 9 rotatable bonds).

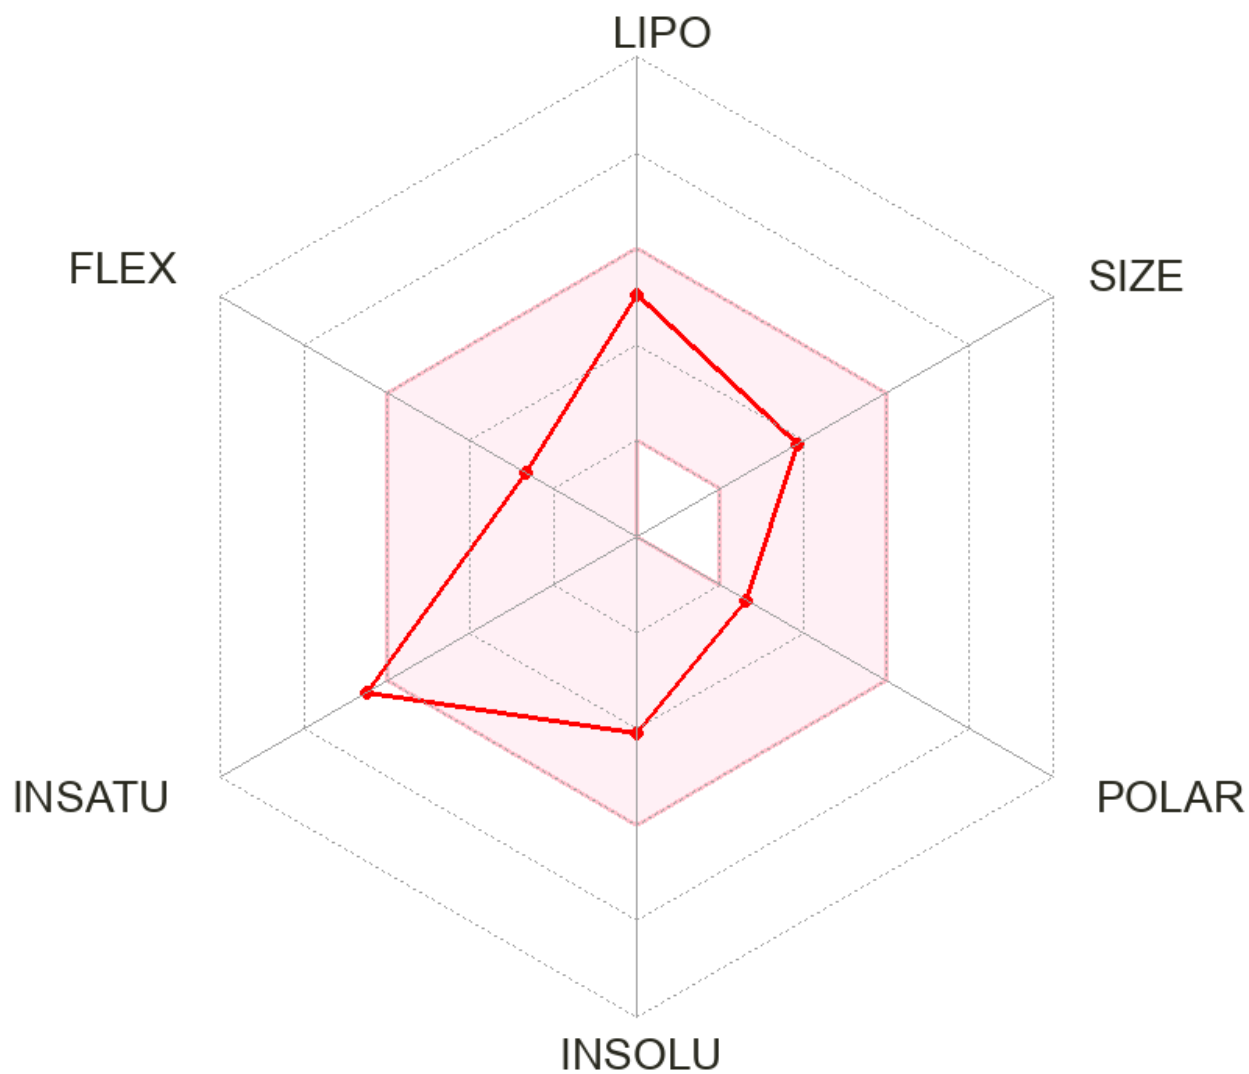

Figure S15. Graphical representations of molecule A3 important physico-chemical features – Bioavailability Radar. The pink area represents the optimal range for each properties (lipophilicity: XLOGP3 between -0.7 and +5.0, size: MW between 150 and 500 g/mol, polarity: TPSA between 20 and 130 Å<sup>2</sup>, solubility: log S not higher than 6,

saturation: fraction of carbons in the  $sp^3$  hybridization not less than 0.25, and flexibility: no more than 9 rotatable bonds.

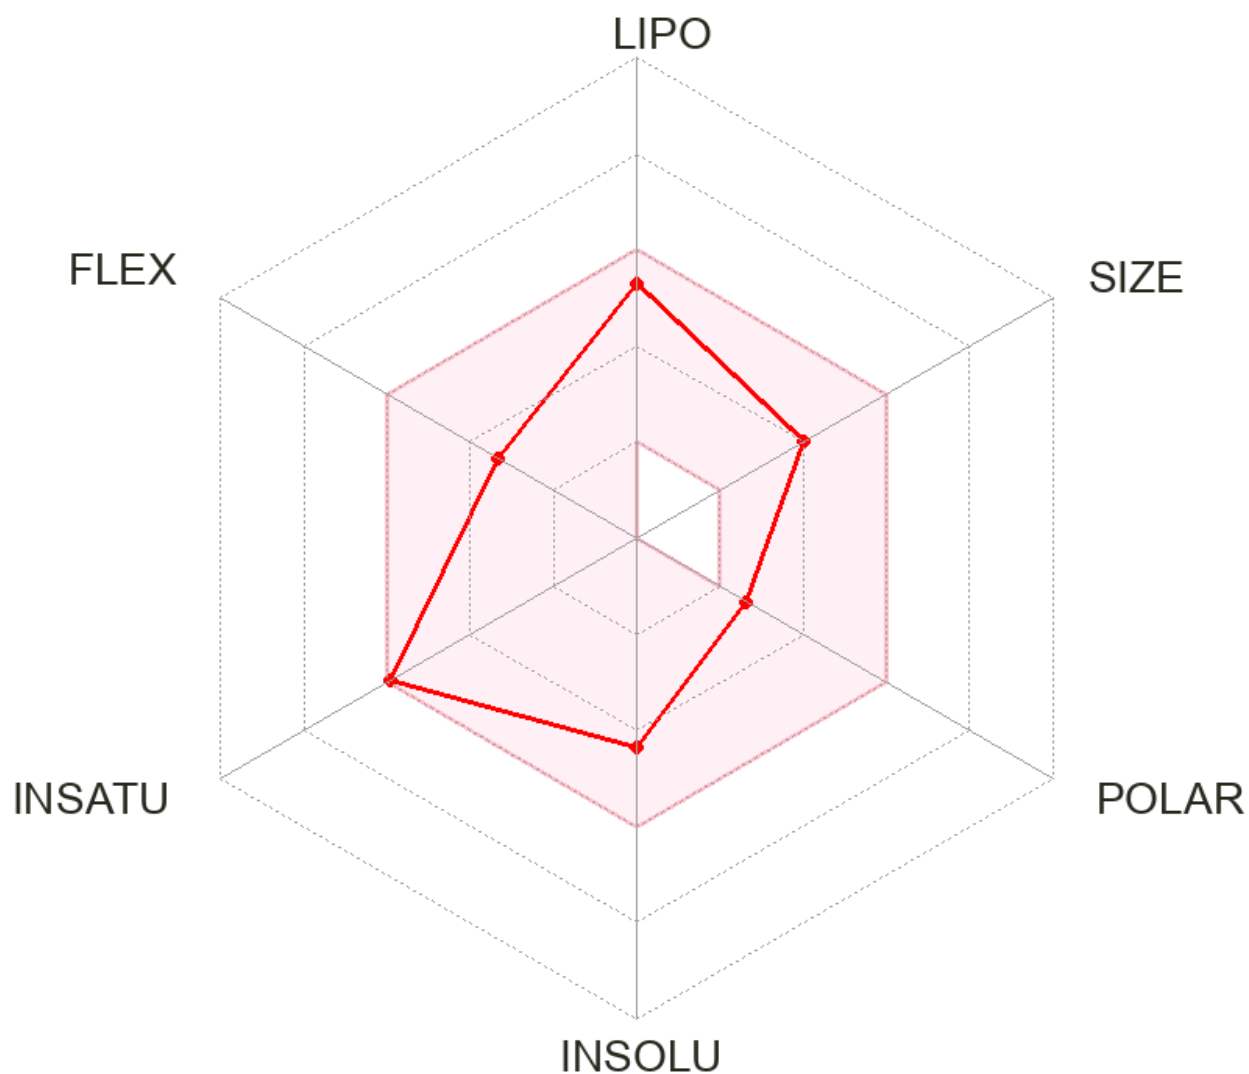

Figure S16. Graphical representations of molecule A4 important physico-chemical features – Bioavailability Radar. The pink area represents the optimal range for each

properties (lipophilicity: XLOGP3 between -0.7 and +5.0, size: MW between 150 and 500 g/mol, polarity: TPSA between 20 and 130 Å<sup>2</sup>, solubility: log S not higher than 6, saturation: fraction of carbons in the sp<sup>3</sup> hybridization not less than 0.25, and flexibility: no more than 9 rotatable bonds).

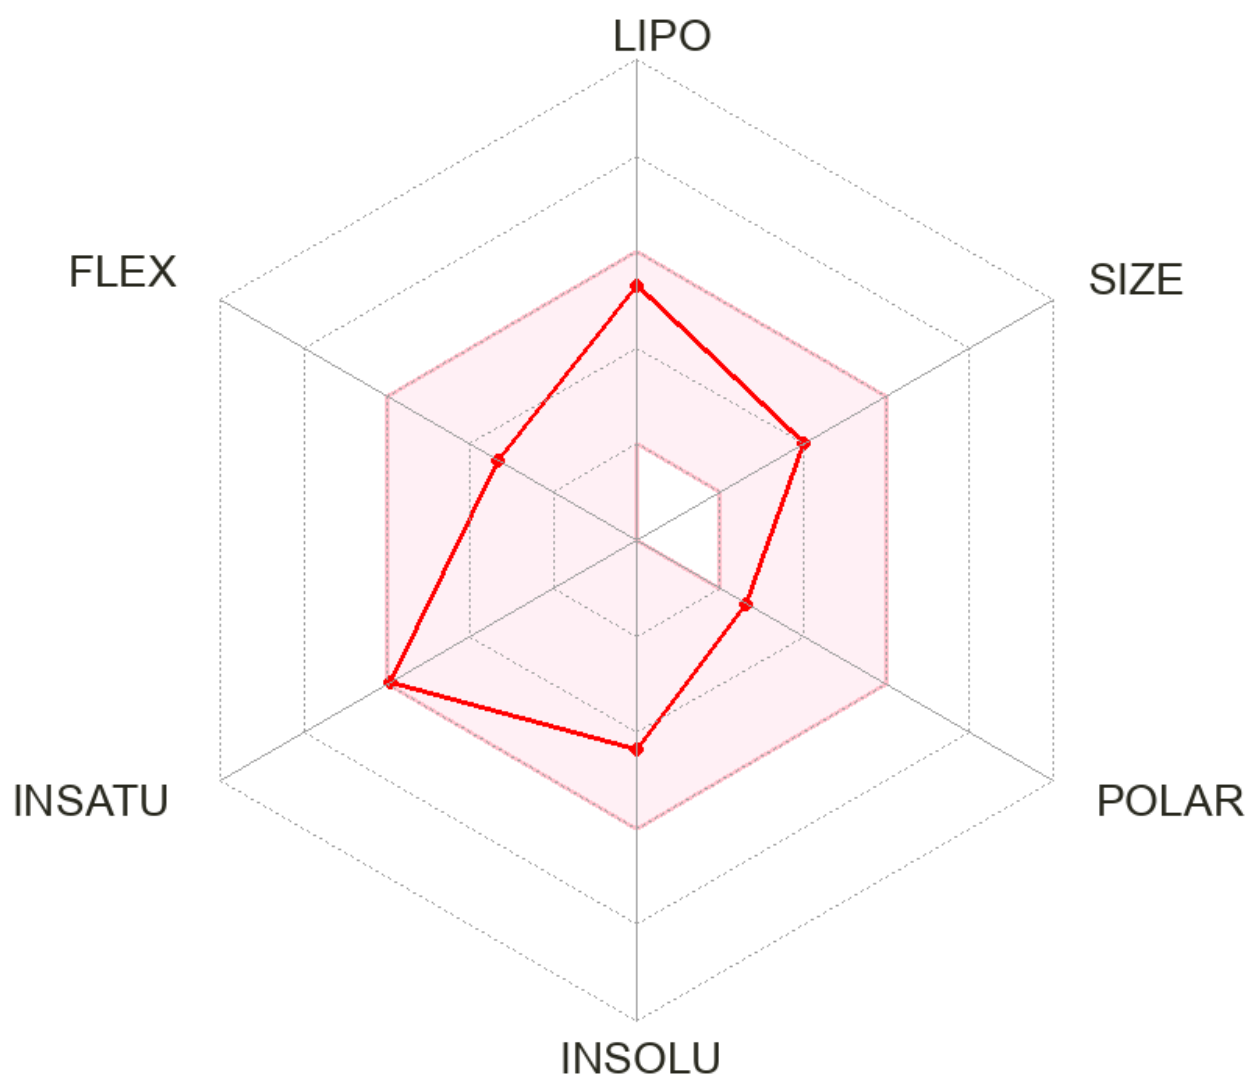



Figure S17. Graphical representations of molecule A5 important physico-chemical features – Bioavailability Radar. The pink area represents the optimal range for each properties (lipophilicity: XLOGP3 between -0.7 and +5.0, size: MW between 150 and 500 g/mol, polarity: TPSA between 20 and 130 Å<sup>2</sup>, solubility: log S not higher than 6, saturation: fraction of carbons in the sp<sup>3</sup> hybridization not less than 0.25, and flexibility: no more than 9 rotatable bonds).

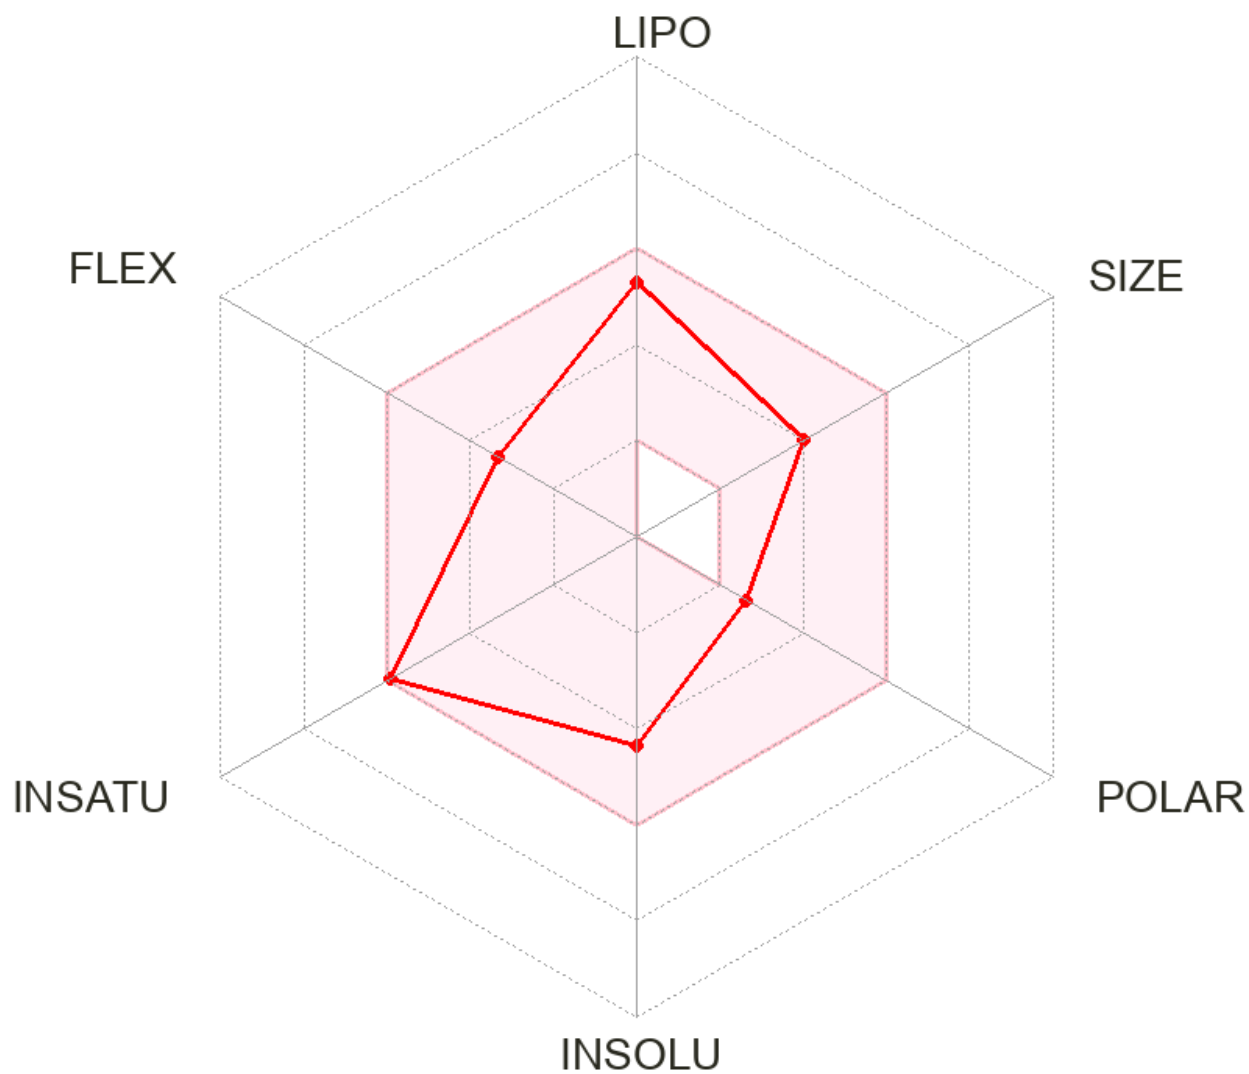

Figure S18. Graphical representations of molecule A6 important physico-chemical features – Bioavailability Radar. The pink area represents the optimal range for each properties (lipophilicity: XLOGP3 between -0.7 and +5.0, size: MW between 150 and 500 g/mol, polarity: TPSA between 20 and 130 Å<sup>2</sup>, solubility: log S not higher than 6,

saturation: fraction of carbons in the  $sp^3$  hybridization not less than 0.25, and flexibility:  
no more than 9 rotatable bonds.

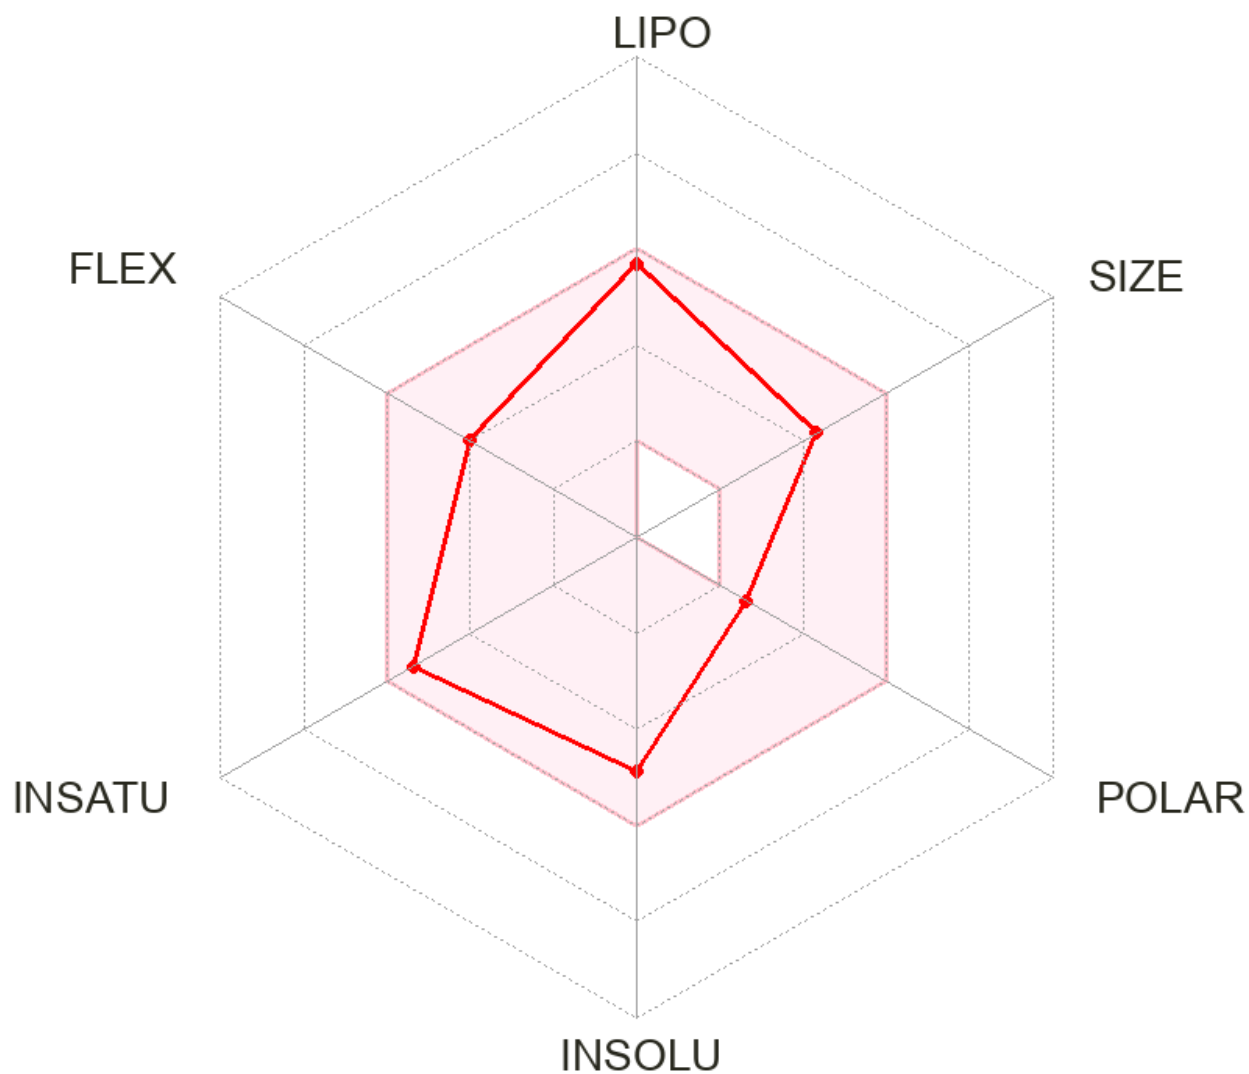

Figure S19. Graphical representations of molecule A7 important physico-chemical features – Bioavailability Radar. The pink area represents the optimal range for each

properties (lipophilicity: XLOGP3 between -0.7 and +5.0, size: MW between 150 and 500 g/mol, polarity: TPSA between 20 and 130 Å<sup>2</sup>, solubility: log S not higher than 6, saturation: fraction of carbons in the sp<sup>3</sup> hybridization not less than 0.25, and flexibility: no more than 9 rotatable bonds.

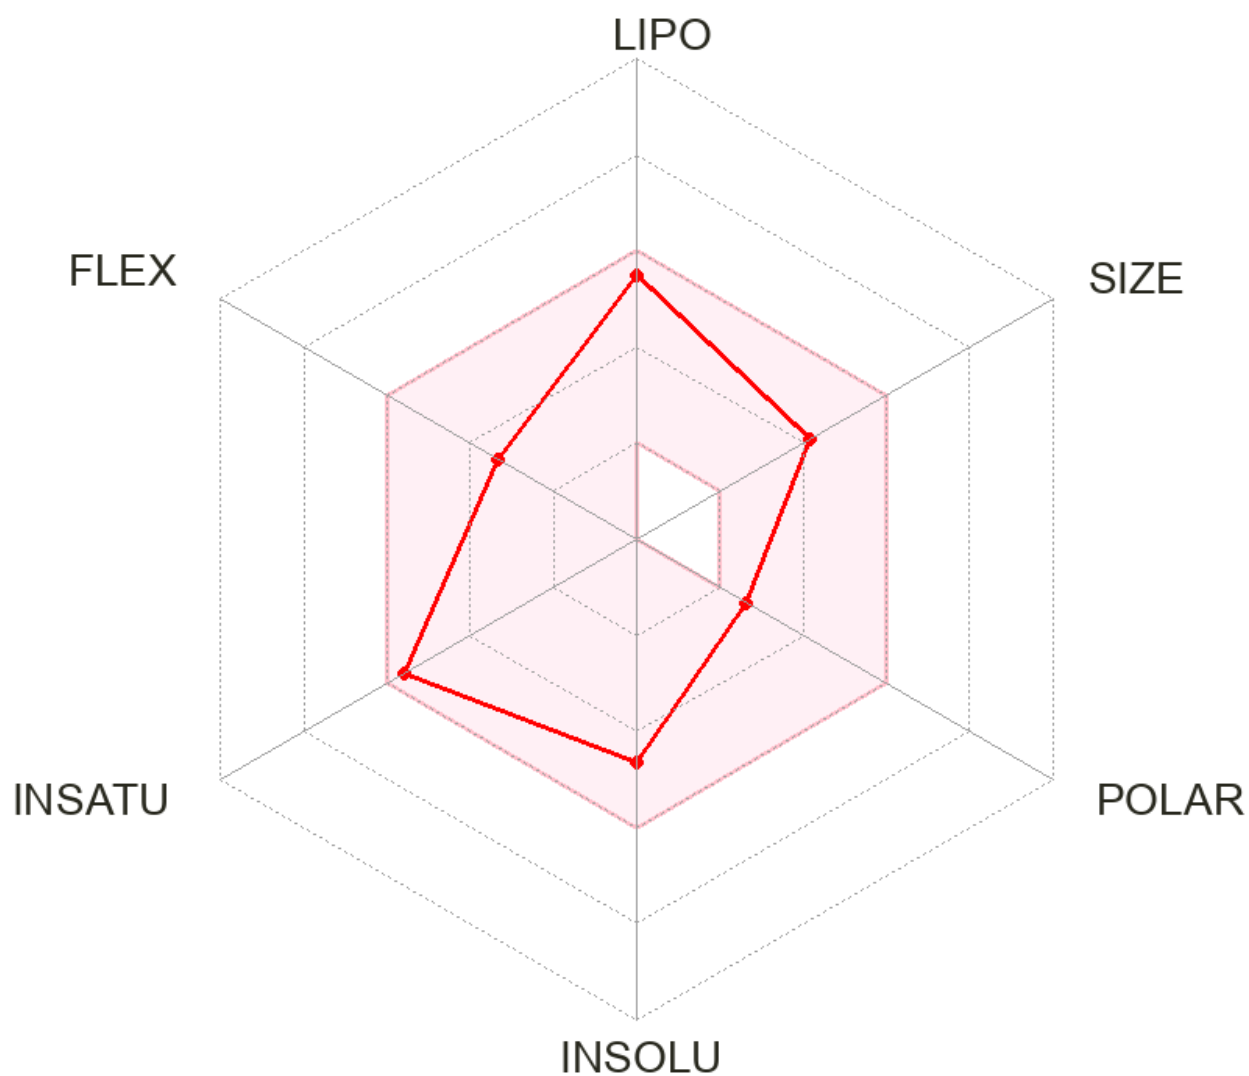

Figure S20. Graphical representations of molecule A8 important physico-chemical features – Bioavailability Radar. The pink area represents the optimal range for each properties (lipophilicity: XLOGP3 between -0.7 and +5.0, size: MW between 150 and 500 g/mol, polarity: TPSA between 20 and 130 Å<sup>2</sup>, solubility: log S not higher than 6, saturation: fraction of carbons in the sp<sup>3</sup> hybridization not less than 0.25, and flexibility: no more than 9 rotatable bonds).

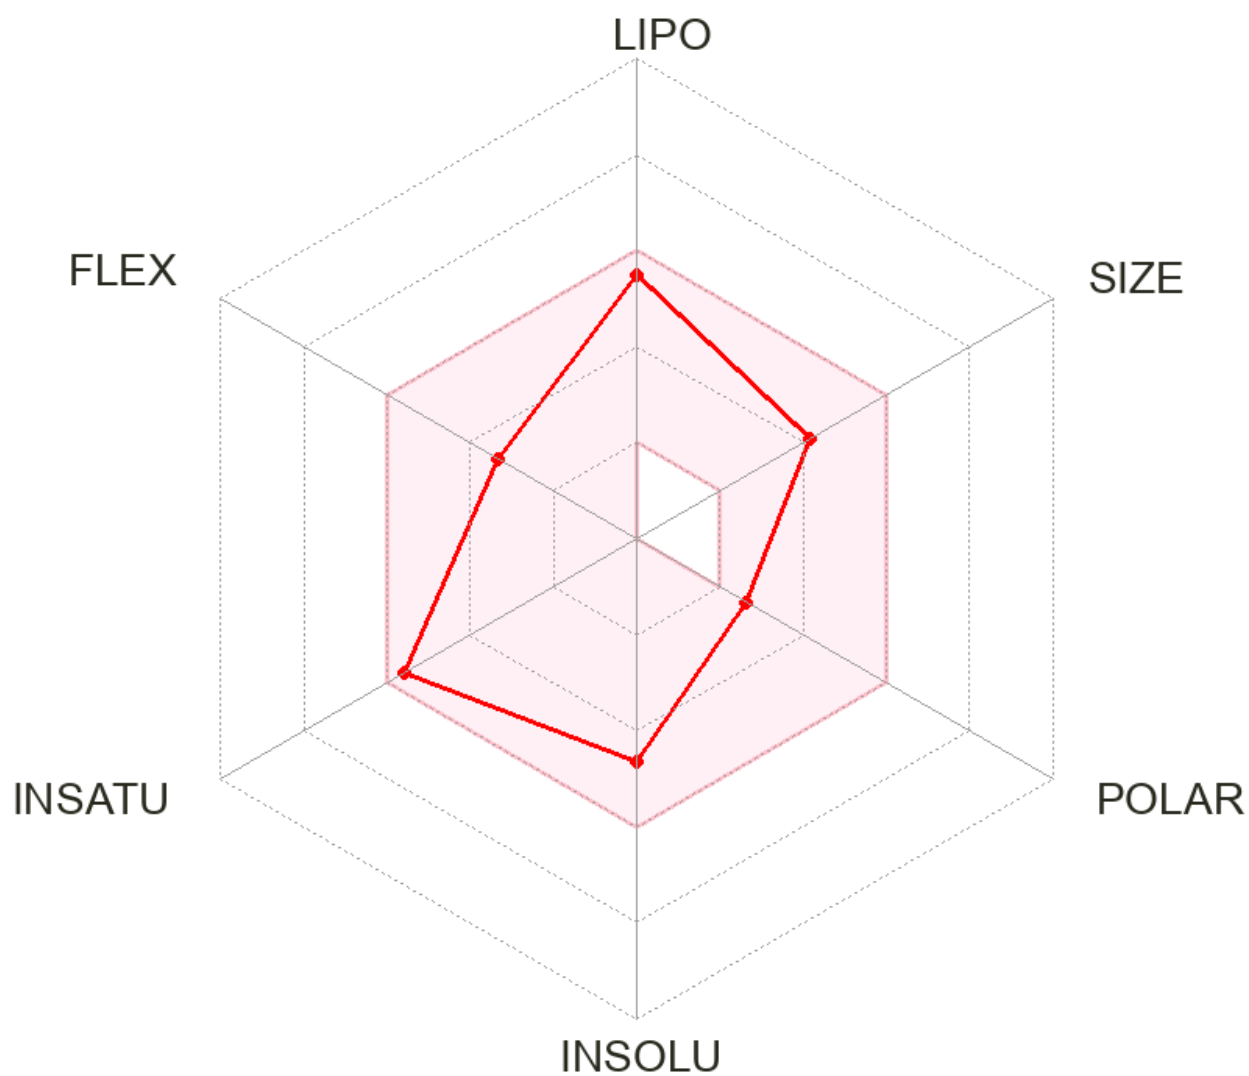

Figure S21. Graphical representations of molecule A9 important physico-chemical features – Bioavailability Radar. The pink area represents the optimal range for each properties (lipophilicity: XLOGP3 between -0.7 and +5.0, size: MW between 150 and 500 g/mol, polarity: TPSA between 20 and 130 Å<sup>2</sup>, solubility: log S not higher than 6,

saturation: fraction of carbons in the  $sp^3$  hybridization not less than 0.25, and flexibility:

no more than 9 rotatable bonds.
